1 **Comparative metabonomic investigations of *Schistosoma japonicum* from SCID**  
2 **mice and BALB/c mice: clues to developmental abnormality of schistosome in**  
3 **the immunodeficient host**

4  
5 *Rong Liu<sup>1,2</sup>, Wen-jun Cheng<sup>1</sup>, Hong-bin Tang<sup>3</sup>, Qin-ping Zhong<sup>1</sup>, Zhen-ping Ming<sup>1</sup>, Hui-fen*  
6 *Dong<sup>1,2#</sup>*

7  
8 *1 School of Basic Medical Sciences, Wuhan University, Wuhan 430071, P. R. of China*

9 *2 Hubei Province Key Laboratory of Allergy and Immunology, School of Basic Medical*  
10 *Sciences, Wuhan University, Wuhan 430071, P. R. of China*

11 *3 Laboratory Animal Center, School of Medicine, Wuhan University, Wuhan 430071, P. R. of*  
12 *China*

13 **# Correspondence should be addressed to:** School of Basic Medical Sciences, Wuhan

14 University. 185 Donghu Road, Wuhan 430071, P. R. of China. Fax: +86 (027) 68759222; E-

15 mail: [hfdong@whu.edu.cn](mailto:hfdong@whu.edu.cn) (Dong H-F).

16

## 1 **Abstract**

2 It has been discovered that the development of schistosome is hampered in immunodeficient  
3 mice, e.g. nude mice lacking T-lymphocytes and the severe combined immune deficient  
4 (SCID) mice lacking both T- and B-lymphocytes. However, it's still unresolved about the  
5 underlying regulatory mechanisms of the retarded growth and development of schistosomes in  
6 their immunodeficient definitive host. In this study, therefore, five replicates of male or female  
7 *Schistosoma japonicum* samples with twenty male or female worms in each sample, were  
8 collected from SCID mice or BALB/c mice at five weeks post infection and used to perform  
9 metabonomic analysis using liquid chromatography tandem mass spectrometry (LC-MS/MS)  
10 platform, for elucidating the growth and development regulation of schistosome in their  
11 definitive hosts from the metabolomic aspect. Based on the identified 1015 ion features in  
12 ESI+ mode and 342 ion features in ESI- mode, multivariate modelling methods including the  
13 Principal Component Analysis (PCA), Partial Least Squares Discriminant Analysis (PLS-DA)  
14 and Orthogonal Partial Least Squares Discriminant Analysis (OPLS-DA) identified distinct  
15 metabolic profiles that clearly differentiated both male and female worms in SCID mice from  
16 those in BALB/c mice, respectively. Common and uniquely perturbed metabolites and their  
17 involved metabolic pathways were identified in male and female worms from SCID mice when  
18 compared with those from BALB/c mice. The results also revealed that more differential  
19 metabolites were found in female worms (one metabolite was up-regulated and forty  
20 metabolites were down-regulated) than male worms (nine metabolites were up-regulated and  
21 twenty metabolites were down-regulated) between SCID mice and BALB/c mice. The top five  
22 increased metabolites of male worms in SCID mice when compared with those in BALB/c  
23 mice were PC(22:6/20:1), L-allothreonine, L-serine, glycerophosphocholine and 5-

1 aminoimidazole ribonucleotide. And the top five decreased metabolites of male worms in  
2 SCID mice when compared with those in BALB/c mice were PC(16:0/0:0), PAF C-16,  
3 PE(18:1/0:0), adenosine and butenoyl PAF. Most of the differential metabolites of female  
4 worms in SCID mice had lower levels when compared with the normal female worms in  
5 BALB/c mice, except for retinyl ester with a higher level. The top five decreased metabolites of  
6 female worms in SCID mice when compared with those in BALB/c mice were adrenic acid, 5-  
7 phosphoribosylamine, PC(16:0/0:0), PC(22:6/20:1) and ergothioneine. The involved metabolic  
8 pathways of the differential metabolites in male worms between SCID mice and BALB/c mice  
9 mainly included taurine and hypotaurine metabolism, glycerophospholipid metabolism,  
10 sphingolipid metabolism, arachidonic acid metabolism, alpha-linolenic acid metabolism, etc.  
11 The involved metabolic pathways of differential metabolites in female worms included mainly  
12 pyrimidine metabolism, sphingolipid metabolism, arachidonic acid metabolism,  
13 glycerophospholipid metabolism, tryptophan metabolism, etc. These findings suggested a  
14 correlation between the retarded growth and development of schistosome in SCID mice and  
15 their perturbed metabolic profiles, which also provided a new insight into the regulation  
16 mechanisms of growth and development of *S. japonicum* worms from the metabolic level, and  
17 provided clues for discovery of drugs or vaccines against the parasites and parasitic disease.

18

19 **Keywords:** *Schistosoma japonicum*; SCID mouse; BALB/c mouse; growth and development;  
20 metabolomics; LC-MS/MS

## 1 **Author summary**

2 The growth and development of schistosome has been discovered hampered in the  
3 immunodeficient hosts. But it remains unresolved about the molecular mechanisms involved in  
4 this. In this study, we tested and compared the metabolic profiles of the male and female  
5 *Schistosoma japonicum* worms collected from SCID mice or BALB/c mice at five weeks post  
6 infection using liquid chromatography tandem mass spectrometry (LC-MS/MS) platform. There  
7 were 1015 ion features in ESI+ mode and 342 ion features in ESI- mode were identified, and  
8 distinct metabolic profiles were found to clearly differentiate both male and female worms in  
9 SCID mice from those in BALB/c mice, respectively. The results also found more differential  
10 metabolites in female worms than in male worms between SCID mice and BALB/c mice. The  
11 enriched metabolic pathways of the differential metabolites in male worms between SCID  
12 mice and BALB/c mice included taurine and hypotaurine metabolism, glycerophospholipid  
13 metabolism, sphingolipid metabolism, arachidonic acid metabolism, alpha-linolenic acid  
14 metabolism, etc. And the enriched metabolic pathways of differential metabolites in female  
15 worms included pyrimidine metabolism, sphingolipid metabolism, arachidonic acid  
16 metabolism, glycerophospholipid metabolism, tryptophan metabolism, etc. The findings in this  
17 study suggested an association between the developmentally stunted schistosome and their  
18 perturbed metabolites and metabolic pathways, which provided a new insight into the  
19 regulation mechanisms of growth and development of *S. japonicum* worms from the metabolic  
20 level, and clues for discovery of drugs or vaccines against the parasites and disease.

21

## 1 **Introduction**

2 Schistosomiasis, caused by infection with a parasitic blood fluke of the genus *Schistosoma*, of  
3 which *Schistosoma mansoni*, *S. haematobium* and *S. japonicum* are of particular health  
4 significance, is still one of the most serious neglected tropical disease in the endemic  
5 countries [1, 2]. Unlike other trematodes, adult schistosomes are dioecious and display a  
6 fascinating codependency in that the female worm is dependent on the male to grow and  
7 sexually mature, by residing in the male's gynecophoral canal [3]. The adult worms in pairs  
8 inhabit the mesenteric veins in the portal venous system of host, and every sexually mature  
9 female worm release thousands of eggs each day. And eggs deposited in the liver, intestinal  
10 wall and other tissues are unfortunately the main pathogenic factor to the severe  
11 schistosomiasis [3]. The highly evolved host-parasite relationship, especially that between  
12 schistosomes and their definitive hosts, is complex and long-lived [4-9].

13 Interestingly, however, it was found that schistosomes showed retarded growth,  
14 development and reproduction in the immunodeficient mammalian hosts, resulting in  
15 attenuated pathogenesis with decreased egg-laying and hepatic granulomas formation in the  
16 hosts [10-15]. Some researches focusing mainly on the host revealed that the host's factors  
17 interleukin (IL)-2 and IL-7 indirectly modulated the development of blood fluke through CD4+ T  
18 cells lymphocytes [10, 11, 14]. TNF was also identified to participate in maintaining the viability  
19 of adult worms with independence of the receptors TNFR1 and TNFR2 [6]. However, few  
20 researches is available about the schistosomes' molecular regulation on their growth and  
21 development.

22 Metabolic profile investigation is a promising approach to identify the key molecules or  
23 signaling pathways competent for addressing the phenotypic differences between worms from

1 different hosts [16-29]. Ultra high performance liquid chromatography and mass spectroscopy  
2 (HPLC-MS) is capable of simultaneously detecting a wide range of small molecule metabolites  
3 and providing a “metabolic fingerprint” of biological samples, and has been used as a well-  
4 established analytical tool with successful application in different fields, e.g., studying of  
5 disease progress, detection of metabolites of inborn defects, phenotypic differentiation of  
6 experimental animal models [30-32]. In this study, therefore, we tested and compared the  
7 metabonomic perturbations of *S. japonicum* worms with sex separation from the severe  
8 combined immunodeficient (SCID) mice at the fifth week post-infection, which were compared  
9 with those from BALB/c mice as the normal control. The results will provide new insights into  
10 understanding of the molecular regulations of growth and development of schistosomes in  
11 their hosts from the metabolic level, as well as clues for discovery of drugs and vaccines  
12 against the parasites and disease.

13

## 14 **Materials and Methods**

### 15 **Ethics statement**

16 All experiments using the *S. japonicum* parasite, *Oncomelania hupensis* (*O. hupensis*) snails,  
17 and mice were performed under protocols approved by Wuhan University Center for Animal  
18 Experiments (WUCAE) according to the Regulations for the Administration of Affairs  
19 Concerning Experimental Animals of China (Ethical approval number: 2016025).

20

### 21 **Parasites and animals**

22 *O. hupensis* snails infected with *S. japonicum* were purchased from the Institute of Parasitic  
23 Disease Control and Prevention, Hunan Province, China. Immunocompetent BALB/c mice and

1 severe combined immunodeficient (SCID) mice of BALB/c genetic background, approximately  
2 6~8 weeks old, were purchased from Beijing Hua Fu Kang Bioscience Co. Inc  
3 (<http://www.hfkbio.com/>) via WUCAE. Cercariae were released by exposing the infected snails  
4 in aged tap water under a light for a minimum of 2 hours at 25°C, and were used to infected  
5 the above two kinds of mice via percutaneous exposure at approximately 40±1 cercariae per  
6 mouse after twelve days of acclimatization. Adult worms were collected by hepato-portal  
7 perfusion of mice with phosphate buffered solution (PBS) on the 35<sup>th</sup> day post infection  
8 according to our previous research [12]. The worms were washed with PBS twice and  
9 separated manually using dissecting needle carefully under an anatomical lens if necessary,  
10 and were finally allocated 20 worms for each aliquot labeled as (1) IB-MALE, (2) IB-FEMALE,  
11 (3) IS-MALE or (4) IS-FEMALE, respectively. All the samples were frozen immediately in liquid  
12 nitrogen and then stored at -80 °C until use for metabolite extraction. In addition, the blood of  
13 mice was collected and serum was isolated and stored at -80 °C for serum metabolomics  
14 investigation, the paper about which was submitted elsewhere.

15

## 16 **Sample preparation**

17 Totally 20 frozen schistosome samples in the above four groups with five replicate samples in  
18 each group were sent to Wuhan Anlong Kexun Co., LTD ([www.anachro.com.cn](http://www.anachro.com.cn)) for  
19 metabonomic detection and analysis using HPLC-MS/MS. The LC-MS grade methanol and  
20 acetonitrile was purchased from Merck & Co., Inc., and formic acid was from Sigma-Aldrich  
21 Co. LLC. Other reagents were all analytically pure. The schistosome samples were thawed  
22 and ground after adding 0.5 ml of methanol/distilled water (8:2, v/v) with 4 µg/ml of 2-Chloro-L-  
23 phenylalanine as the internal standard substance, and were then centrifuged at 13000 rpm

1 under 4 °C for 10 min. 200 µl of supernatant from each sample was carefully transferred to a  
2 vial of autosampler for examination. All samples were kept at 4 °C and analyzed in a random  
3 manner. Additionally, isometric supernatant from each sample of the above four groups were  
4 mixed for QC sample. The QC sample was run after every 2 tested samples to monitor the  
5 stability of the system.

6

### 7 **Metabolomics analysis by HPLC-MS/MS**

8 Liquid chromatography was performed on a 1290 Infinity UHPLC system (Agilent  
9 Technologies, Santa Clara, CA, U.S.A.). The separation of all samples was performed on an  
10 ACQUITY UPLC @HSS T3 column (Waters, U.K.) (100 mm \* 2.1 mm, 2.5 µm). A gradient  
11 elution program was run for chromatographic separation with mobile phase A (0.1% formic  
12 acid in water) and mobile phase B (0.1% formic acid in acetonitrile) as follows: 0~2 min,  
13 95%A-95%A; 2~13 min, 95%A-5%A; 13~15 min, 5%A-5%A. The sample injection volume was  
14 3 µL and the flow rate was set as 0.4 mL/min. The column temperature was set at 25 °C, and  
15 the post time was set as 5 min.

16 A 6538 UHD and Accurate-Mass Q-TOF (Agilent Technologies, Santa Clara, CA, USA)  
17 equipped with an electrospray ionization (ESI) source was used for mass spectrometric  
18 detection. The electrospray ionization mass spectra for sample analysis were acquired in both  
19 positive ion mode (ESI+) and negative ion mode (ESI-). The operating parameters were as  
20 follows: capillary, 4000 V (ESI+) or 3000 V (ESI-); sampling cone: 45 V; source temperature:  
21 110 °C (ESI+) or 120 °C (ESI-); desolvation temperature: 350 °C; desolvation gas, 11 L/min;  
22 source offset (skimmer1): 60 V; TOF acquisition mode: sensitivity (ESI+) or sensitivity (ESI-);  
23 acquisition method, continuum MSE; TOF mass range: 100-1000 Da; scan time: 0.2 s;



1 collision energy function 2: trap CE ramp 20 to 40 eV. Quality control (QC) samples were used  
2 in order to assess the reproducibility and reliability of the LC-MS/MS system. QC samples  
3 prepared as mentioned above were used to provide a 'mean' profile representing all analyses  
4 encountered during the analysis. The pooled 'QC' samples were run before and after every  
5 two study samples to ensure system equilibration. Two reference standard compounds purine  
6 ( $C_5H_4N_4$ ) (with m/z 121.0509 in ESI+ mode and m/z 119.0363 in ESI- mode) and hexakis  
7 (1H,1H,3H-tetrafluoro-pentoxo)-phosphazene ( $C_{18}H_{18}O_6N_3P_3F_{24}$ ) (with m/z 922.0098 in ESI+  
8 mode and m/z 966.0007 in ESI- mode) were continuously infused into the system to allow  
9 constant mass correction during the run.

10

### 11 **Metabolic data analysis**

12 Raw spectrometric data were uploaded to and analyzed with the MassHunter Qualitative  
13 Analysis B.04.00 software (Agilent Technologies, USA) for untargeted peak detection, peak  
14 alignment, peak grouping, normalization and integration on each full data set (study samples  
15 and QC samples). The molecular features, characterized by retention time (RT),  
16 chromatographic peak intensity, and accurate mass, were obtained by using the Molecular  
17 Feature Extractor algorithm. The features were then analyzed with the MassHunter Mass  
18 Profiler Professional software (Agilent Technologies). Only features with an intensity of  $\geq$   
19 20,000 counts (approximately three times the detection limit of the LC-MS/MS instrument used  
20 in this study) that were found in at least 80% of the samples at the same sampling time point  
21 were kept for further processing. Next, a tolerance window of 0.15 min and 2 mDa was used  
22 for alignment of retention time and m/z values, and the data were also normalized by the  
23 internal standard 2-Chloro-L-phenylalanine added when sample preparation. The data matrix

1 was then mean-centered and Pareto-scaled prior to multivariate analysis (MVA) using  
2 Principal Component Analysis (PCA), Partial Least Squares Discriminant Analysis (PLS-DA)  
3 and Orthogonal Partial Least Squares Discriminant Analysis (OPLS-DA) to discriminate  
4 comparison groups using the function module *Statistical Analysis* on the online application  
5 *MetaboAnalyst* (<http://www.metaboanalyst.ca/>) [33-35]. The quality of the models was  
6 evaluated with the relevant parameters  $R^2$  and  $Q^2$ , which were discussed elsewhere (Lee et  
7 al., 2003). And differences between groups (IS-MALE vs. IB-MALE, and IS-FEMALE vs. IB-  
8 FEMALE) were determined using Student's *t*-test, and the adjusted *P* value (false discovery  
9 rate, FDR) of <0.05 was considered to be of statistical significance. Fold change (FC)  
10 analysis, which was used to show how the selected differential metabolites varied between the  
11 compared groups, was also performed to further filter the features/metabolites of particular  
12 concern with an FC of  $\geq 1.2$  or  $\leq 0.8$  between the compared groups.

13 The structure identification of the differential metabolites was based on the methods  
14 described as follows. Briefly, the element compositions of the metabolites were first calculated  
15 with MassHunter software from Agilent based on the exact mass, the nitrogen rule, and the  
16 isotope pattern. Then, the elemental composition and exact mass were used for open source  
17 database searching, including LIPIDMAPS (<http://www.lipidmaps.org/>), HMDB  
18 (<http://www.hmdb.ca/>), METLIN (<http://metlin.scripps.edu/>), and MassBank  
19 (<http://www.massbank.jp/>). Next, MS/MS experiments were performed to obtain structural  
20 information via the interpretation of the fragmentation pattern of the metabolite. The MS/MS  
21 spectra of possible metabolite candidates in the databases were also searched and matched.

22 *MetaboAnalyst* was used to perform metabolic pathway analysis of the differentially  
23 expressed metabolites. The identified pathways associated with the abnormal growth and

1 development of schistosome in SCID mice are presented according to the  $P$ -values from the  
2 pathway enrichment analysis (y-axis) and pathway impact values from pathway topology  
3 analysis (x-axis), with the most impacted pathways colored in red color.

4

## 5 **Results**

### 6 **Metabolic profiles**

7 All total ion chromatograms (TIC) of QC samples exhibited stable retention times without  
8 obvious peaks' drifts (Figure S1), which indicated good capability of the LC-MS/MS based-  
9 metabolomics approach used in this study. Totally, 1015 ion features in ESI+ mode and 342  
10 ion features in ESI- mode were obtained in all the male or female *S. japonicum* worms  
11 samples, respectively. The stability and reproducibility of the HPLC-MS/MS method was  
12 evaluated by performing principal components analysis (PCA) on all the samples, together  
13 with 10 QC samples. The QC samples are generally clustered closely to each other and are  
14 separated from the tested samples in the two-dimensional PCA score plots (Figure 1-A, B)  
15 and PLS-DA score plots (Figure 1-C, D), though a moderate separation among the QC  
16 samples in ESI+ mode was observed (Figure 1-A), which confirms good stability and  
17 reproducibility of the chromatographic separation during the whole sequence. In addition,  
18 although the male worms (both IS-MALE and IB-MALE) were clearly separated from the  
19 female worms (both IS-FEMALE and IB-FEMALE), the male worms IS-MALE and IB-MALE  
20 were partially overlapped in the two-dimensional PCA score plots in both ion modes (Figure 1-  
21 A, B), while the female worms IS-FEMALE and IB-FEMALE were completely separated in  
22 ESI- mode (Figure 1-B), which indicated larger differences between male and female worms  
23 than the differences between the worms of the same sex derived from two different hosts, and

1 larger differences between IS-FEMALE and IB-FEMALE than that between IS-MALE and IB-  
2 MALE. Similar results were also found in the two-dimensional PLS-DA models performed on  
3 all the samples, and it yielded distinct separation of the tested four groups of worms in both  
4 ESI+ (Figure 1-C) and ESI- mode (Figure 1-D).

5

### 6 **Metabolomic profiles distinguish between *S. japonicum* worms from SCID mice and** 7 **those from BALB/c mice**

8 Score scatter plots for two-dimensional OPLS-DA model in both ESI+ mode (Figure 2-A) and  
9 ESI- mode (Figure 2-B) showed good discrimination between the male worms from SCID mice  
10 and those from BALB/c mice (IS-MALE vs. IB-MALE), which was also demonstrated in the  
11 heatmap based on the differential metabolites of the 10 male worms samples (Figure 2-C).  
12 Likewise, the score plots for two dimensional OPLS-DA mode in both ESI+ mode (Figure 2-D)  
13 and ESI- mode (Figure 2-E) also showed distinct group separation between the female worms  
14 samples from SCID mice and those from BALB/c mice (IS-FEMALE vs. IB-FEMALE), which  
15 was further supported by the heatmap constructed based on the 10 female worms samples  
16 (Figure 2-F).

17

### 18 **Patterns of metabolites with differential amount in schistosome**

19 Twenty-nine differential ion features/metabolites (FDR<0.05, and FC  $\geq 1.2$  or  $\leq 0.8$ ), with nine  
20 increased and twenty decreased, were identified between IS-MALE vs. IB-MALE (Table S1,  
21 Figure 2-C). Five of the increased metabolites, PC(22:6/20:1) (which was traditionally named  
22 as lecithin), L-allothreonine, L-serine, glycerophosphocholine, and 5-aminoimidazole  
23 ribonucleotide, even had an FC >1.5, particularly for PC(22:6/20:1) involved in the

1 glycerophospholipid metabolism having an FC of 17.53 between IS-MALE vs. IB-MALE. None  
2 of the twenty decreased metabolites had an FC <0.5 between IS-MALE vs. IB-MALE.  
3 Meanwhile, forty-one differential features/metabolites were identified between IS-FEMALE and  
4 IB-FEMALE (Table S2, Figure 2-F). Retinyl ester, a metabolite of the retinol metabolism  
5 pathway, is the only metabolite that showed up-regulated between IS-FEMALE and IB-  
6 FEMALE. Four of the remained forty decreased metabolites, 5-phosphoribosylamine,  
7 PC(16:0/0:0), PC(22:6/20:1) and ergothioneine, even had an FC <0.5 between IS-FEMALE  
8 and IB-FEMALE.

9 Comparison of differential metabolic profiles between IS-MALE vs. IB-MALE and IS-  
10 FEMALE vs. IB-FEMALE found that eleven features/metabolites were common in their  
11 differential metabolites (Table 1, Figure 3-A, B). Most of the common differential metabolites in  
12 both male and female worms had the similar decrease trend in the SCID mice, except that  
13 PC(22:6/20:1) increased in male worms but decreased in female worms in SCID mice  
14 compared with BALB/c mice (Table 1 and Figure 3-B). After removing the common differential  
15 metabolites, eighteen differential metabolites were distinct in IS-MALE vs. IB-MALE (Table 2,  
16 Figure 3-C), and thirty differential metabolites were distinct in IS-FEMALE vs. IB-FEMALE  
17 (Table 3, Figure 3-D), which is more than male worms. These differential metabolites common  
18 and distinct in male worms or female worms in SCID mice compared with BALB/c mic may be  
19 associated with the abnormal growth and development of worms in SCID mice, and the  
20 differential metabolites distinct in male worms or female worms should be associated with  
21 larger differences between IS-FEMALE and IB-FEMALE than those between IS-MALE and IB-  
22 MALE.

23

1 **Table 1 List of the common differential metabolites in male and female worms**  
 2 **from SCID mice**

| ESI<br>Mode | m/z      | RT (min) | Male worms |          |                                       | Female worms |          |                                       | Metabolites     |
|-------------|----------|----------|------------|----------|---------------------------------------|--------------|----------|---------------------------------------|-----------------|
|             |          |          | P value    | FDR      | FC(M <sub>IS</sub> /M <sub>IB</sub> ) | P value      | FDR      | FC(F <sub>IS</sub> /F <sub>IB</sub> ) |                 |
| +           | 550.387  | 12.1807  | 3.21E-05   | 0.000546 | 0.54                                  | 0.000218     | 0.001573 | 0.57                                  | Butenoyl PAF    |
| +           | 152.0568 | 1.4347   | 0.022438   | 0.027246 | 0.79                                  | 0.003534     | 0.006597 | 0.74                                  | Guanine         |
| +           | 205.0975 | 3.9998   | 0.009361   | 0.013994 | 0.75                                  | 0.00142      | 0.003787 | 0.61                                  | L-Tryptophan    |
|             |          |          |            |          |                                       |              |          |                                       | LysoPC(20:2)/   |
| +           | 548.3715 | 11.2785  | 0.000244   | 0.001152 | 0.65                                  | 0.001202     | 0.003416 | 0.64                                  | PC(O-18:2/2:0)/ |
|             |          |          |            |          |                                       |              |          |                                       | PC(20:2/0:0)    |
|             |          |          |            |          |                                       |              |          |                                       | LysoPC(22:1)/   |
| +           | 578.4181 | 13.7448  | 7.20E-05   | 0.000612 | 0.66                                  | 4.00E-05     | 0.000746 | 0.57                                  | PC(22:1/0:0)    |
| +           | 524.3717 | 11.9213  | 0.000386   | 0.001458 | 0.62                                  | 0.000301     | 0.001573 | 0.63                                  | PAF C-16        |
| +           | 552.4029 | 13.4095  | 0.001334   | 0.004072 | 0.67                                  | 0.012797     | 0.01586  | 0.72                                  | PAF C-18        |
| +           | 496.3402 | 10.5067  | 0.000265   | 0.001152 | 0.62                                  | 0.024157     | 0.027552 | 0.47                                  | PC(16:0/0:0)    |
| +           | 860.6126 | 14.5507  | 0.00236    | 0.005349 | 17.53                                 | 0.009766     | 0.012718 | 0.31                                  | PC(22:6/20:1)   |
| +           | 454.2931 | 10.5736  | 0.000823   | 0.002798 | 0.72                                  | 0.00111      | 0.003416 | 0.60                                  | PE(16:0/0:0)    |
| +           | 460.2796 | 10.9475  | 1.99E-05   | 0.000546 | 0.63                                  | 0.000269     | 0.001573 | 0.65                                  | PE(P-16:0/0:0)  |

3 ESI mode: +, positive ion mode; -, negative ion mode. m/z: mass-to-charge ratio. RT: retention time.

4 FDR: false discovery rate. FC: fold change.

5

6

1 **Table 2 List of the male worm-specific differential metabolites between SCID mice**  
 2 **and BALB/c mice**

| ESI Mode | m/z      | RT(min) | P values | FDR      | FC (M <sub>IS</sub> /M <sub>IB</sub> ) | Metabolites                     |
|----------|----------|---------|----------|----------|----------------------------------------|---------------------------------|
| -        | 118.0509 | 0.6543  | 0.017517 | 0.023823 | 1.88                                   | L-Allothreonine                 |
| -        | 104.0354 | 0.6497  | 0.008371 | 0.013552 | 1.81                                   | L-Serine                        |
| +        | 258.1101 | 0.6723  | 0.004564 | 0.008621 | 1.78                                   | Glycerophosphocholine           |
| +        | 296.0658 | 0.6469  | 0.00484  | 0.008661 | 1.57                                   | 5-Aminoimidazole ribonucleotide |
| -        | 179.0556 | 0.654   | 0.049459 | 0.049459 | 1.27                                   | L-(+)-Gulose                    |
| -        | 102.0549 | 0.6795  | 0.01748  | 0.023823 | 1.26                                   | N-Ethylglycine                  |
| -        | 124.0058 | 0.6871  | 0.003978 | 0.007956 | 1.26                                   | Taurine                         |
| -        | 199.0373 | 0.6377  | 0.041292 | 0.043873 | 1.21                                   | L-Fucose                        |
| +        | 146.1176 | 3.6118  | 0.04623  | 0.047631 | 0.79                                   | Acetylcholine                   |
| +        | 282.2795 | 9.3158  | 0.003731 | 0.007928 | 0.78                                   | Oleamide                        |
| +        | 300.2902 | 9.3158  | 0.000153 | 0.001038 | 0.78                                   | Sphingosine                     |
| +        | 482.3605 | 10.8804 | 0.009467 | 0.013994 | 0.73                                   | Lyso-PAF C-16                   |
| +        | 508.3405 | 12.2338 | 0.001437 | 0.004072 | 0.73                                   | Gymnodimine                     |
| +        | 576.4024 | 12.5121 | 0.000271 | 0.001152 | 0.72                                   | LysoPC(22:2)                    |
| +        | 520.3399 | 10.1254 | 0.001677 | 0.004386 | 0.72                                   | PC(18:2/0:0)                    |
| +        | 302.3053 | 9.016   | 0.000153 | 0.001038 | 0.67                                   | Sphinganine                     |
| +        | 480.309  | 10.8995 | 4.90E-05 | 0.000556 | 0.61                                   | PE(18:1/0:0)                    |
| +        | 268.1045 | 1.2762  | 0.005214 | 0.008864 | 0.57                                   | Adenosine                       |

3 ESI mode: +, positive ion mode; -, negative ion mode. m/z: mass-to-charge ratio. RT: retention time.

1 FDR: false discovery rate. FC: fold change.

2

3 **Table 3 List of the female worm-specific differential metabolites between SCID**  
 4 **mice and BALB/c mice**

| ESI Mode | m/z      | RT(min) | P values | FDR      | FC (F <sub>IS</sub> /F <sub>IB</sub> ) | Metabolites                                                                                           |
|----------|----------|---------|----------|----------|----------------------------------------|-------------------------------------------------------------------------------------------------------|
| -        | 301.2171 | 12.9477 | 0.000132 | 0.001233 | 2.34                                   | Retinyl ester                                                                                         |
| +        | 269.0885 | 1.4201  | 0.003199 | 0.006398 | 0.80                                   | Arabinosylhypoxanthine                                                                                |
| -        | 464.3143 | 12.3082 | 0.025349 | 0.027741 | 0.80                                   | PC(P-15:0/0:0)/PE(P-18:0/0:0)/PE(O-18:1/0:0)                                                          |
| +        | 137.046  | 1.4199  | 0.000225 | 0.001573 | 0.79                                   | Hypoxanthine                                                                                          |
| -        | 191.0178 | 0.8004  | 0.008998 | 0.011998 | 0.79                                   | Citric acid/Isocitric acid/Diketogulonic acid/<br>2,3-Diketo-L-gulonate                               |
| -        | 596.3926 | 13.4124 | 0.010324 | 0.013139 | 0.79                                   | CerP(18:1/12:0)                                                                                       |
| +        | 284.0993 | 1.4349  | 0.025797 | 0.027741 | 0.78                                   | Guanosine                                                                                             |
| +        | 298.0974 | 4.0607  | 0.00461  | 0.007822 | 0.78                                   | 5'-Methylthioadenosine                                                                                |
| +        | 123.0554 | 1.0077  | 0.001965 | 0.004584 | 0.77                                   | Niacinamide                                                                                           |
| -        | 267.0717 | 1.4171  | 0.002114 | 0.004735 | 0.76                                   | Inosine                                                                                               |
| -        | 256.0576 | 0.6944  | 0.007146 | 0.010815 | 0.76                                   | N-Acetylmannosamine/N-Acetyl-b-D-<br>galactosamine/Beta-N-Acetylglucosamine/N-<br>Acetylgalactosamine |
| -        | 219.0968 | 0.6785  | 0.0246   | 0.027552 | 0.72                                   | N-Acetyl-b-glucosaminyllamine                                                                         |
| -        | 327.2327 | 13.3711 | 0.00792  | 0.011671 | 0.71                                   | Docosahexaenoic acid                                                                                  |
| -        | 592.3605 | 11.2786 | 0.004009 | 0.007241 | 0.69                                   | PC(16:0/5:0(CHO))                                                                                     |



|   |          |         |          |          |      |                                                                                                           |
|---|----------|---------|----------|----------|------|-----------------------------------------------------------------------------------------------------------|
| + | 132.1019 | 1.172   | 0.004177 | 0.00731  | 0.68 | L-Isoleucine                                                                                              |
| - | 480.309  | 11.876  | 0.00122  | 0.003416 | 0.67 | LysoPC(15:0)/LysoPE(0:0/18:0)/PC(14:0/O-1:0)/PC(7:0/O-8:0)/PE(18:0/0:0)/PC(15:0/0:0)                      |
| - | 293.1175 | 4.4634  | 0.003346 | 0.006462 | 0.67 | Glutamylphenylalanine                                                                                     |
| - | 557.3195 | 10.6175 | 0.000432 | 0.001862 | 0.66 | Oleic Acid-biotin                                                                                         |
| + | 182.0811 | 1.1304  | 0.001879 | 0.004574 | 0.65 | L-Tyrosine                                                                                                |
| - | 146.0449 | 0.6795  | 0.013028 | 0.01586  | 0.64 | L-Glutamic acid                                                                                           |
| - | 540.3297 | 10.6169 | 0.000736 | 0.002944 | 0.64 | (25R)-3alpha,7alpha-dihydroxy-5beta-cholestan-27-oyl taurine /<br>LysoPC(P-18:1)/C-8 Ceramide-1-phosphate |
| - | 452.2769 | 10.5719 | 0.002999 | 0.006219 | 0.63 | LysoPE(0:0/16:0)/PE(16:0/0:0)/PC(13:0/0:0)                                                                |
| - | 281.2481 | 14.5325 | 7.09E-05 | 0.000794 | 0.63 | Vaccenic acid/Oleic acid                                                                                  |
| - | 535.1528 | 1.4173  | 0.001719 | 0.004375 | 0.59 | 1,4-beta-D-Glucan/Isocaviunin 7-O-glucoside                                                               |
| + | 146.0602 | 4.0002  | 0.000858 | 0.003004 | 0.58 | 4-formyl Indole                                                                                           |
| - | 303.2326 | 13.5603 | 0.000836 | 0.003004 | 0.56 | Arachidonic acid                                                                                          |
| - | 478.2923 | 10.9031 | 0.000403 | 0.001862 | 0.55 | LysoPE(0:0/18:1)                                                                                          |
| - | 331.2635 | 14.2904 | 0.000309 | 0.001573 | 0.51 | Adrenic acid                                                                                              |
| - | 264.005  | 0.7038  | 2.66E-05 | 0.000745 | 0.50 | 5-Phosphoribosylamine                                                                                     |
| + | 230.0967 | 0.7226  | 7.35E-07 | 4.12E-05 | 0.29 | Ergothioneine                                                                                             |

1 ESI mode: +, positive ion mode; -, negative ion mode. m/z: mass-to-charge ratio. RT: retention time.

2 FDR: false discovery rate. FC: fold change.

3

1 By searching against “The Human Metabolome Database” (HMDB, access via  
2 <http://www.hmdb.ca/>) for metabolite classification, “glycerophospholipids”, “organonitrogen  
3 compounds” and “carboxylic acids and derivatives” were found as the top three categories ( $\geq$   
4 3 differential metabolites involved) of differential metabolites between IS-MALE vs. IB-MALE  
5 (Figure 4-A). Metabolite set enrichment analysis (MSEA, access via  
6 <http://www.metaboanalyst.ca/>) found that “bile acid biosynthesis”, “taurine and hypotaurine  
7 metabolism”, “sphingolipid metabolism”, “retinol metabolism”, “purine metabolism”, “fructose  
8 and mannose degradation”, “ammonia recycling”, “glycine and serine metabolism”,  
9 “homocysteine degradation”, “phosphatidylethanolamine biosynthesis”, “methionine  
10 metabolism” and “selenoamino acid metabolism” were the prominently enriched metabolite  
11 sets (with adjusted  $P$  values  $< 0.05$ ) based on the differential metabolites between IS-MALE  
12 vs. IB-MALE (Table S3, Figure 4-B). Meanwhile, “glycerophospholipids”, “carboxylic acids and  
13 derivatives”, “organonitrogen compounds”, “fatty acyls” and “purine nucleosides” were the top  
14 five enriched categories of differential metabolites between IS-FEMALE vs. IB-FEMALE  
15 (Figure 4-C). And MSEA based on the differential metabolites between IS-FEMALE vs. IB-  
16 FEMALE found that “retinol metabolism”, “alpha linolenic acid and linoleic acid metabolism”,  
17 “purine metabolism”, “sphingolipid metabolism” and “glutamate metabolism” were the  
18 prominently enriched metabolite sets with raw  $P$  values  $< 0.05$  but only “retinol metabolism”  
19 has an adjusted  $P$  value  $< 0.05$  (Table S4, Figure 4-D). Moreover, most (9/11) of the common  
20 differential metabolites between IS-MALE vs. IB-MALE and IS-FEMALE vs. IB-FEMALE  
21 belong to glycerophospholipids (Figure 4-E), which was enriched by MSEA to phospholipid  
22 biosynthesis (Table S5, Figure 4-F). The differential metabolites distinct in IS-MALE vs. IB-  
23 MALE were classified prominently into “organonitrogen compounds”, “glycerophospholipids”

1 and “carboxylic acids and derivatives” (Figure 4-G), which were enriched prominently to  
2 “sphingolipid metabolism”, “purine Metabolism”, “methionine metabolism”, “selenoamino acid  
3 metabolism”, “bile acid biosynthesis”, “taurine and hypotaurine metabolism”, “retinol  
4 metabolism” and “betaine metabolism” (Table S6, Figure 4-H). The differential metabolites  
5 distinct in IS-FEMALE vs. IB-FEMALE were classified prominently into “glycerophospholipids”,  
6 “carboxylic acids and derivatives”, “fatty acyls”, “organonitrogen compounds” and “purine  
7 nucleosides” (Figure 4-I), which were enriched prominently to “retinol metabolism”, “purine  
8 metabolism”, “glutamate metabolism”, “alpha linolenic acid and linoleic acid metabolism” and  
9 “warburg effect” (Table S7, Figure 4-J).

10

### 11 **Altered metabolic pathways and their biological significance**

12 The pathway analysis performed using *MetaboAnalyst* for the involved biological pathways  
13 and biological roles of the above differentially expressed metabolites determined that the  
14 perturbed metabolic pathways reporting lower p-values and higher pathway impact in male  
15 worms from SCID mice compared with those from BALB/c mice mainly included arachidonic  
16 acid metabolism, alpha-linolenic acid metabolism, taurine and hypotaurine metabolism,  
17 sphingolipid metabolism, glycerophospholipid metabolism, and etc (Table S8, Figure S2-A).  
18 Meanwhile, more affected metabolic pathways in female worms from SCID mice compared  
19 with those from BALB/c mice were determined, and the top 5 metabolic pathways included  
20 biotin metabolism, tryptophan metabolism, purine metabolism, glyoxylate and dicarboxylate  
21 metabolism, tyrosine metabolism (Table S9, Figure S2-B).

22 Metabolic pathways analysis based on the common differential metabolites between IS-  
23 MALE vs. IB-MALE and IS-FEMALE vs. IB-FEMALE found that tryptophan metabolism,

1 aminoacyl-tRNA biosynthesis, purine metabolism, glycerophospholipid metabolism,  
2 arachidonic acid metabolism and alpha-linolenic acid metabolism were commonly perturbed in  
3 both male and female worms from SCID mice compared with BALB/c mice (Table S10, Figure  
4 S2-C). Metabolic pathways analysis based on the differential metabolites distinct in IS-MALE  
5 vs. IB-MALE found their involved metabolic pathways included sphingolipid metabolism,  
6 glycerophospholipid metabolism, taurine and hypotaurine metabolism, purine metabolism,  
7 glycine/serine/threonine metabolism, cysteine and methionine metabolism, cyanoamino acid  
8 metabolism, glyoxylate and dicarboxylate metabolism and aminoacyl-tRNA biosynthesis  
9 (Table S11, Figure S2-D). More metabolic pathways based on the differential metabolites  
10 distinct in IS-FEMALE vs. IB-FEMALE were found and the top five metabolic pathways were  
11 arachidonic acid metabolism, glycerophospholipid metabolism, glycosylphosphatidylinositol  
12 (GPI)-anchor biosynthesis, alpha-linolenic acid metabolism and glyoxylate and dicarboxylate  
13 metabolism (Table S12, Figure S2-E).

14

## 15 **Discussion**

16 The schistosomes exhibit dioecy and have a complex life cycle transforming between their  
17 definitive hosts - mammals and their intermediate hosts - snails. Every mature female worm  
18 lay hundreds to thousands of eggs per day, which is a complex metabolic process such as the  
19 fatty acid oxidation, etc [36]. A certain part of the released eggs are deposited in the liver,  
20 intestinal wall and other tissues, which are the key pathogenic factor to severe  
21 schistosomiasis. So, it is a feasible approach to control schistosomiasis by interfering with the  
22 growth, development and oviposition of schistosomes in their hosts. It has been already  
23 discovered that schistosome showed retarded growth, development and reproduction in the

1 immunodeficient mammalian hosts, and exerted attenuated pathogenesis with decreased  
2 egg-laying and granulomas formation in the hosts. However, very limited knowledge about the  
3 molecular mechanism behind the distinct phenotypic abnormalities of schistosomes in their  
4 immunodeficient hosts is accessible. For the abnormal schistosomes in immunodeficient  
5 hosts, e.g. SCID mice, we believe it is a perfect model by comparative omics to identify  
6 molecules potentially participate in the regulation of growth and development of schistosomes  
7 when compared with those with normal growth and development in immunocompetent mice,  
8 e.g. BALB/c mice. In this study, therefore, an untargeted LC-MS/MS-based high-resolution  
9 metabolomic investigation was performed and distinct bio-signatures in the metabolic profiles  
10 of male and female *S. japonicum* worms in SCID mice were found when compared with those  
11 in BALB/c mice, respectively.

12 In the results, multivariate analysis by both PCA and PLS-DA found larger differences  
13 between IS-FEMALE and IB-FEMALE than that between IS-MALE and IB-MALE. This  
14 indicates the female schistosome worms were affected more severely than the male worms in  
15 SCID mice, which was verified by the subsequent finding that more differential metabolites  
16 were acquired in IS-FEMALE vs. IB-FEMALE than IS-MALE vs. IB-MALE. This is expectable  
17 and reasonable as the growth and development of female worms were affected by male  
18 worms as well as the host's factors, i.e. the sexual maturation of female worms depends on  
19 pairing with male worms. In the list of differential metabolites of IS-FEMALE vs. IB-FEMALE,  
20 retinyl ester was the only up-regulated metabolite of female worms from SCID mice, which  
21 was enriched in "retinol metabolism". Numerous researches reported that the retinol  
22 metabolism, in which retinyl ester is involved, regulates gametogenesis and reproduction by  
23 the product transcriptionally active retinoic acid [37-41]. In the retinol metabolism pathway of

1 animals, all-trans retinyl esters in the body is formed by transferring a fatty acyl moiety from  
2 the sn-1 position of membrane phosphatidyl choline (e.g. PC(22:6/20:1), traditionally named  
3 as lecithin) to all-trans-retinol under the catalysis of lecithin:retinol acyltransferase (LRAT),  
4 whose orthologue in *Schistosoma* is diacylglycerol O-acyltransferase (DGAT). Unesterified all-  
5 trans-retinol, which could be reversibly liberated from all-trans retinyl esters stores through the  
6 action of a retinyl ester hydrolase (REH), is oxidized by one retinol dehydrogenase (RDH) to  
7 all-trans-retinal, which can be also reversibly transformed to all-trans-retinol by the catalysis of  
8 retinal reductase (RALR). All-trans-retinal, which is originally derived from the decomposition  
9 of proretinoid carotenoids such as dietary  $\beta$ -carotene, is then irreversibly oxidized by one  
10 retinal dehydrogenase (RALDH) to form transcriptionally active all-trans retinoic acid [42].  
11 LRAT is a key enzyme involved in retinoids homeostasis and is regulated in response to  
12 retinoic acid, and it can also negatively regulate retinoic acid biosynthesis by diverting retinol  
13 away from oxidative activation [42]. Therefore, we speculate higher level of retinyl ester found  
14 in the female worms from SCID mice logically means lower level of lecithin, which should be  
15 consumed to synthesize retinyl ester. What was consistent with this inference was that  
16 PC(22:6/20:1) (HMDB0008735, with full name as 1-docosahexaenoyl-2-eicosenoyl-sn-  
17 glycerol-3-phosphocholine, or traditional name as lecithin) happened to be decreased in the  
18 female worms from SCID mice when compared with those from BALB/c mice in the results  
19 (Figure 5). So, we speculated that the accumulated retinyl ester in the female worms from  
20 SCID mice resulted in insufficient formation of the active retinoic acid. It is known that retinoic  
21 acid is the meiosis-inducing factor in both sexes, and inhibition of retinoic acid biosynthesis  
22 would markedly suppresses gametogenesis [37-41, 43-54]. In addition, overexpression of  
23 LRAT will favor retinyl ester formation, which would disrupt retinol homeostasis and interrupt

1 the ability of downstream metabolites to regulate transcription of genes involved in various  
2 biological processes. Various cancer cells have been found to have low levels of LRAT and  
3 retinyl ester levels. Overexpression of LRAT or increased level of retinyl esters themselves  
4 makes cells more sensitive to carcinogen-induced tumorigenesis and leison [55, 56]. So,  
5 insufficient retinoic acid biosynthesis due to prevailing retinyl ester formation could be a  
6 significant cause for the retarded development and declined fertility appeared in female worms  
7 from SCID mice in this study. Meanwhile, lecithin is a source of several active compounds:  
8 choline and its metabolites are needed for several physiological purposes, including cell  
9 membrane signaling and cholinergic neurotransmission during growth and reproduction [57,  
10 58]. So, excessive lecithin consumption in retinyl ester formation probably lead to worse effect  
11 in the development and reproduction of schistosomes besides insufficient retinoic acid  
12 biosynthesis. In contrast, however, an extremely higher level of lecithin was detected in the  
13 male worms from SCID mice than BALB/c mice, with a relative fold as high as 17.53 for IS-  
14 MALE vs. IB-MALE. It is known that the schistosomes are dioecious trematodes, and  
15 embracing with the male worm by residing in the male's gynaecophoric channel is crucial for  
16 the female worm to grow and sexually mature [59]. So, we speculated that insufficient  
17 interaction between the male and female worms, which manifested as decreased percent of  
18 worm pairs reported in our previous research [12], resulted in insufficient material exchange or  
19 transfer between them, such as the probable lecithin transfer from male worms to female  
20 worms. Similar alterations in fatty acyls, glycerophospholipids, purine nucleosides,  
21 imidazopyrimidines and indoles and derivatives were detected in both male and female worms  
22 from SCID mice when compared with BALB/c mice, but opposite alterations were detected in  
23 carboxylic acids and derivatives (Figure 4-A, C, E). Common decrease in

1 glycerophospholipids synthesis with lysoPCs, lysoPEs and PCs as the top three alter  
2 metabolites, one of the main functions of which is to serve as a structural component of  
3 biological membranes [60, 61], indicated attenuated parasite establishment with smaller body  
4 size and attenuated reproduction due to potentially deficient glycerophospholipids in worms  
5 from SCID mice. Sphingolipids are commonly believed to protect the cell surface against  
6 harmful environmental factors [62, 63], and arachidonic acid is involved in cellular signaling as  
7 a lipid second messenger as a polyunsaturated fatty acid present in the phospholipids [64,  
8 65]. Their involved metabolic pathways of important biological significance such as  
9 sphingolipid metabolism and arachidonic acid metabolism were also found abnormal with  
10 decreased sphingolipids in male and arachidonic acid in female worms from SCID mice,  
11 respectively, which may be also associated with the developmentally stunted worms.

12 Furthermore, the level of tryptophan, an essential amino acid, was found decreased in both  
13 male and female worms from SCID mice. Tryptophan acts as a precursor for the synthesis of  
14 the neurotransmitters melatonin and serotonin and then, any reduction in tryptophan will lead  
15 to a number of conditions or diseases e.g. dermatitis and psychiatric symptom – depression in  
16 animals, it seems in this study to contribute to inhibiting of the growth and reproduction of  
17 worms finally [66-71]. Ergothioneine is a product of plant origin that accumulates in animal  
18 tissues and a naturally occurring metabolite of histidine that has antioxidant properties though  
19 its physiological role in vivo is undetermined [72]. Decrease of ergothioneine was found in  
20 female worms from SCID mice, which indicated increased susceptibility to oxidative damage  
21 in them [73-75].

22 In conclusion, the identified differential metabolites and their involved metabolic pathways  
23 are likely associated with the abnormalities in growth and development of *S. japonicum* worms



1 in SCID mice when compared with those in BALB/c mice. Differential alterations in metabolic  
2 profiles between male and female worms from SCID mice when compared with BALB/c mice  
3 indicated the degree and mechanism of the influence the host on male and female worms  
4 were different. Our data has demonstrated the great ability of LC-MS/MS-based metabolomics  
5 to detect a broad range of differential metabolites in worms that strongly distinguished  
6 between their different hosts - the SCID mice and BALB/c mice. The above mentioned  
7 differential metabolites, together with the others not mentioned here in particular, need further  
8 verification and investigations for their underlying mechanisms in the regulation of growth and  
9 development of schistosome. This will, as a result, greatly facilitate the discovery of new drugs  
10 and vaccines against schistosome and schistosomiasis.

11

12

1 **Supporting Information**

2

3 **Figure legends**

4 **Figure 1. Differential metabolic profiles of male and female *S. japonicum* worms**

5 **between SCID mice and BALB/c mice at 35 days post infection.** Principal

6 component analysis (PCA) score scatter plots of metabolites obtained from LC-MS/MS

7 fingerprints in ESI+ (A) and ESI- mode (B). Partial least-squares discriminant analysis (PLS-

8 DA) separating metabolites of the four groups of worms and QC sample in ESI+ (C) and ESI-

9 mode (D). IB-MALE denotes the male worms from BALB/c mice, which are marked with green

10 plus sign. IB-FEMALE denotes the female worms from BALB/c mice, which are marked with

11 red triangles. IS-MALE denotes the male worms from SCID mice, which are marked with blue

12 diamonds. IS-FEMALE denotes the female worms from SCID mice, which are marked with

13 purple cross. QC denotes the quality control samples, which are marked with pink triangles.

14

15 **Figure 2. Discrimination between the *S. japonicum* worms from SCID mice and**

16 **those from BALB/c mice with *S. japonicum* infection for 35 days based on ESI+**

17 **and ESI- mode-derived metabolic phenotypes and heatmaps of the differential**

18 **metabolites between the compared groups.**

19 **A-B:** Orthogonal partial least-squares discriminant analysis (OPLS-DA) score plots in ESI+

20 mode (A) and ESI- mode (B) for comparison between male worms from SCID mice and those

21 from BALB/c mice (IB-MALE denotes the male worms from BALB/c mice and IS-MALE

22 denotes the male worms from SCID mice). **C:** Heatmap of the differential metabolites between

23 male worms from SCID mice and those from BALB/c mice. **D-E:** Orthogonal partial least-

1 squares discriminant analysis (OPLS-DA) score plots in ESI+ mode (A) and ESI- mode (B) for  
2 comparison between female worms from SCID mice and those from BALB/c mice (IB-  
3 FEMALE denotes the female worms from BALB/c mice and IS-FEMALE denotes the female  
4 worms from SCID mice). **F**: Heatmap of the differential metabolites between female worms  
5 from SCID mice and those from BALB/c mice. For the heatmaps, normalized signal intensities  
6 (log<sub>2</sub> transformed and row adjustment) are visualized as a color spectrum and the scale from  
7 least abundant to highest ranges is from -3.0 to 3.0 as shown in the colorbar. Green indicates  
8 decreased expression, whereas red indicates increased expression of the detected  
9 metabolites between compared groups.

10

11 **Figure 3. Comparison of metabolomics between the *S. japonicum* worms from**  
12 **SCID mice and those from BALB/c mice with *S. japonicum* infection for 35 days**  
13 **heatmaps of their differential metabolites.**

14 **A**: Differential metabolites across comparison groups showing unique and common  
15 metabolites between IS-MALE vs. IB-MALE and IS-FEMALE vs. IB-FEMALE. Venn diagram  
16 displays comparatively the differentially expressed metabolites. All the differentially expressed  
17 metabolites are clustered into two comparison groups represented by two circles. The sum of  
18 all the figures in one circle represents the number of differentially expressed metabolites in  
19 one comparison group (e.g. IS-MALE vs. IB-MALE). The overlapping part of the two circles  
20 represents the number of differentially expressed metabolites shared between the two  
21 comparison groups. The single-layer part represents the number of metabolites distinctly  
22 found in a certain comparison group. **B-C**: Heatmap of the common (B) and distinct (C is for  
23 male worms and D is for female worms) differential metabolites between male worms and

1 female worms. For the heatmaps, normalized signal intensities (log<sub>2</sub> transformed and row  
2 adjustment) are visualized as a color spectrum and the scale from least abundant to highest  
3 ranges is from -3.0 to 3.0 as shown in the colorbar. Green indicates decreased expression,  
4 whereas red indicates increased expression of the detected metabolites between compared  
5 groups.

6

7 **Figure 4. Enrichment analysis of the differential metabolites across comparison**

8 **groups. A:** Top 8 enriched metabolite terms of the differentially expressed metabolites of IS-  
9 MALE vs. IB-MALE. The bars on x-axis represent the number of metabolites for the chemical  
10 classes mentioned on the y-axis. **B:** Enriched metabolite sets of the differentially expressed  
11 metabolites of IS-MALE vs. IB-MALE. **C:** Top 11 enriched metabolite terms of the differentially  
12 expressed metabolites of IS-FEMALE vs. IB-FEMALE. **D:** Enriched metabolite sets of the  
13 differentially expressed metabolites of IS-FEMALE vs. IB-FEMALE. **E:** Enriched metabolite  
14 terms of the common differentially expressed metabolites between IS-MALE vs. IB-MALE and  
15 IS-FEMALE vs. IB-FEMALE. **F:** Enriched metabolite sets of the differentially expressed  
16 metabolites between IS-MALE vs. IB-MALE and IS-FEMALE vs. IB-FEMALE. **G:** Enriched  
17 metabolite terms of the differentially expressed metabolites distinct in IS-MALE vs. IB-MALE. **H:**  
18 Enriched metabolite sets of the differentially expressed metabolites distinct in IS-MALE vs. IB-  
19 MALE. **I:** Enriched metabolite terms of the differentially expressed metabolites distinct in IS-  
20 FEMALE vs. IB-FEMALE. **J:** Enriched metabolite sets of the differentially expressed metabolites  
21 distinct in IS-FEMALE vs. IB-FEMALE.

22

23

1 **Figure 5. The metabolism of retinoids** Retinal can be originally formed by the  
2 cleavage of proretinoid carotenoids such as beta-carotene by the enzyme BCMO1 (not shown  
3 here). Retinol is formed by the reversible reduction of retinal by one of the retinal reductase  
4 family members. The enzyme lecithin:retinol acyl-transferase (LRAT) (with an orthologue gene  
5 called diacylglycerol O-acyltransferase (DGAT) in *Schistosoma japonicum*) synthesizes retinyl  
6 esters by transferring a fatty acyl moiety from the sn-1 position of membrane phosphatidyl  
7 choline such as lecithin (PC(22:6/20:1)) to retinol. Unesterified retinol is liberated from retinyl  
8 ester stores by the catalysis of a retinyl ester hydrolase (REH). Retinol is oxidized by catalysis  
9 of one retinol dehydrogenase (RDH) to retinal, which is then irreversibly oxidized by one  
10 retinal dehydrogenase (RALDH) to form transcriptionally active retinoic acid. Retinoic acid is  
11 finally oxidized/catabolized to more water-soluble hydroxy- and oxo- forms by one of several  
12 cytochrome P450 enzyme family members.

13  
14 **Figure S1. The stacked total ion chromatograms of QC sample. A:** The stacked  
15 total ion chromatogram of QC sample in ESI+ mode. **B:** The stacked total ion chromatogram  
16 of QC sample in ESI- mode. The bars on x-axis represent the retention time (0~15 min) and  
17 the bars on y-axis represent the total ion strength.

18  
19 **Figure S2. Summary of the aberrant metabolic pathways based on the**  
20 **significantly altered metabolites of the comparison groups as analyzed by**  
21 **Pathway Analysis of *MetaboAnalyst*.** Plots show the matched pathways depicted  
22 according to *P*-value from pathway enrichment analysis and pathway impact score from  
23 pathway topology analysis. **A:** Enriched metabolic pathways based on the differential

1 metabolites between IS-MALE vs. IB-MALE. **B**: Enriched metabolic pathways based on the  
2 differential serum metabolites between IS-FEMALE vs. IB-FEMALE. **C**: Enriched metabolic  
3 pathways based on the differential metabolites common in IS-MALE vs. IB-MALE and IS-  
4 FEMALE vs. IB-FEMALE. **D**: Enriched metabolic pathways based on the differential  
5 metabolites distinct in IS-MALE vs. IB-MALE. **E**: Enriched metabolic pathways based on the  
6 differential metabolites distinct in IS-FEMALE vs. IB-FEMALE. Color gradient and circle size  
7 indicate the significance of the pathway ranked by *P*-value (yellow: higher *P*-values and red:  
8 lower *P*-values) and pathway impact score (the larger the circle the higher the impact score),  
9 respectively. Significantly affected pathways with low *P*-value and high pathway impact score  
10 are identified by name.

11

## 12 **Supporting table legends**

13 **Table S1. Differential metabolites of male worms from SCID mice compared with**  
14 **those from BALB/c mice.** This table contains a list of the differential metabolites  
15 between male worms from SCID mice and male worms from BALB/c mice.

16 (DOCX)

17

18 **Table S2. Differential metabolites of female worms from SCID mice compared with**  
19 **those from BALB/c mice.** This table contains a list of the differential metabolites  
20 between female worms from SCID mice and female worms from BALB/c mice.

21 (DOCX)

22

23 **Table S3. Metabolite set enrichment of the differential metabolites of male worms**  
24 **between SCID mice and BALB/c mice.** Metabolite sets are enriched of the differential  
25 metabolites between male worms from SCID mice and male worms from BALB/c mice.

26 (DOCX)

1

2 **Table S4. Metabolite set enrichment of the differential metabolites of female**  
3 **worms between SCID mice and BALB/c mice.** Metabolite sets are enriched of the  
4 differential metabolites between female worms from SCID mice and female worms from  
5 BALB/c mice.

6 (DOCX)

7

8 **Table S5. Metabolite set enrichment of the common differential metabolites in**  
9 **male and female worms from SCID mice.** Metabolite sets are enriched of the common  
10 differential metabolites between male worms and female worms from SCID mice  
11 compared with those from BALB/c mice.

12 (DOCX)

13

14 **Table S6. Metabolite set enrichment of the male worm-specific differential**  
15 **metabolites between SCID mice and BALB/c mice.** Metabolite sets are enriched of  
16 the male worm-specific differential metabolites between SCID mice and BALB/c mice.

17 (DOCX)

18

19 **Table S7. Metabolite set enrichment of the female worm-specific differential**  
20 **metabolites of those between SCID mice and BALB/c mice.** Metabolite sets are  
21 enriched of the female worm-specific differential metabolites between SCID mice and  
22 BALB/c mice.

23 (DOCX)

24

25 **Table S8. Pathway analysis of the differential metabolites of male worms between**  
26 **SCID mice and BALB/c mice.** This list contains the enriched metabolic pathways of  
27 the differential metabolites of male worms between SCID mice and BALB/c mice.

28 (DOCX)

1

2 **Table S9. Pathway analysis of the differential metabolites of female worms**  
3 **between SCID mice and BALB/c mice.** This list contains the enriched metabolic  
4 pathways of the differential metabolites of female worms between SCID mice and  
5 BALB/c mice.

6 (DOCX)

7

8 **Table S10. Pathway analysis of the common differential metabolites in male and**  
9 **female worms from SCID mice.** This list contains the enriched metabolic pathways of  
10 the common differential metabolites between male worms and female worms from SCID  
11 mice compared with those from BALB/c mice.

12 (DOCX)

13

14 **Table S11. Pathway analysis of the male worm-specific differential metabolites**  
15 **between SCID mice and BALB/c mice.** This list contains the enriched metabolic  
16 pathways of the male worm-specific differential metabolites between SCID mice and  
17 BALB/c mice.

18 (DOCX)

19

20 **Table S12. Pathway analysis of the female worm-specific differential metabolites**  
21 **between SCID mice and BALB/c mice.** This list contains the enriched metabolic  
22 pathways of the female worm-specific differential metabolites between SCID mice and  
23 BALB/c mice.

24 (DOCX)

25

26



## 1 **References**

- 2 1. Gray DJ, McManus DP, Li Y, Williams GM, Bergquist R, Ross AG. Schistosomiasis  
3 elimination: lessons from the past guide the future. *The Lancet Infectious diseases*.  
4 2010;10(10):733-6. doi: 10.1016/S1473-3099(10)70099-2. PubMed PMID: 20705513.
- 5 2. WHO. Schistosomiasis: number of people receiving preventive chemotherapy in 2012. *Releve*  
6 *epidemiologique hebdomadaire*. 2014;89(2):21-8. PubMed PMID: 24446558.
- 7 3. Ross AG, Bartley PB, Sleigh AC, Olds GR, Li Y, Williams GM, et al. Schistosomiasis. *The*  
8 *New England journal of medicine*. 2002;346(16):1212-20. doi: 10.1056/NEJMra012396.  
9 PubMed PMID: 11961151.
- 10 4. Saule P, Adriaenssens E, Delacre M, Chassande O, Bossu M, Auriault C, et al. Early  
11 variations of host thyroxine and interleukin-7 favor *Schistosoma mansoni* development. *The*  
12 *Journal of parasitology*. 2002;88(5):849-55. doi: 10.1645/0022-  
13 3395(2002)088[0849:EVOHTA]2.0.CO;2. PubMed PMID: 12435119.
- 14 5. de Mendonca RL, Escriva H, Bouton D, Laudet V, Pierce RJ. Hormones and nuclear  
15 receptors in schistosome development. *Parasitology today*. 2000;16(6):233-40. PubMed  
16 PMID: 10827428.
- 17 6. Davies SJ, Lim KC, Blank RB, Kim JH, Lucas KD, Hernandez DC, et al. Involvement of TNF in  
18 limiting liver pathology and promoting parasite survival during schistosome infection.  
19 *International journal for parasitology*. 2004;34(1):27-36. PubMed PMID: 14711587; PubMed  
20 Central PMCID: PMC2859728.
- 21 7. Halton DW. Nutritional adaptations to parasitism within the platyhelminthes. *International*  
22 *journal for parasitology*. 1997;27(6):693-704. PubMed PMID: 9229252.
- 23 8. Hernandez DC, Lim KC, McKerrow JH, Davies SJ. *Schistosoma mansoni*: sex-specific

- 1 modulation of parasite growth by host immune signals. *Experimental parasitology*.  
2 2004;106(1-2):59-61. doi: 10.1016/j.exppara.2004.01.003. PubMed PMID: 15013791;  
3 PubMed Central PMCID: PMC2891232.
- 4 9. You H, Gobert GN, Cai P, Mou R, Nawaratna S, Fang G, et al. Suppression of the Insulin  
5 Receptors in Adult *Schistosoma japonicum* Impacts on Parasite Growth and Development:  
6 Further Evidence of Vaccine Potential. *PLoS neglected tropical diseases*.  
7 2015;9(5):e0003730. doi: 10.1371/journal.pntd.0003730. PubMed PMID: 25961574; PubMed  
8 Central PMCID: PMC4427307.
- 9 10. Lamb EW, Walls CD, Pesce JT, Riner DK, Maynard SK, Crow ET, et al. Blood fluke  
10 exploitation of non-cognate CD4+ T cell help to facilitate parasite development. *PLoS*  
11 *pathogens*. 2010;6(4):e1000892. doi: 10.1371/journal.ppat.1000892. PubMed PMID:  
12 20442785; PubMed Central PMCID: PMC2861709.
- 13 11. Blank RB, Lamb EW, Tocheva AS, Crow ET, Lim KC, McKerrow JH, et al. The common  
14 gamma chain cytokines interleukin (IL)-2 and IL-7 indirectly modulate blood fluke development  
15 via effects on CD4+ T cells. *The Journal of infectious diseases*. 2006;194(11):1609-16. doi:  
16 10.1086/508896. PubMed PMID: 17083048; PubMed Central PMCID: PMC2853799.
- 17 12. Tang H, Ming Z, Liu R, Xiong T, Grevelding CG, Dong H, et al. Development of adult worms  
18 and granulomatous pathology are collectively regulated by T- and B-cells in mice infected with  
19 *Schistosoma japonicum*. *PloS one*. 2013;8(1):e54432. doi: 10.1371/journal.pone.0054432.  
20 PubMed PMID: 23349889; PubMed Central PMCID: PMC3551845.
- 21 13. Cheng YL, Song WJ, Liu WQ, Lei JH, Mo HM, Ruppel A, et al. The effects of T cell deficiency  
22 on the development of worms and granuloma formation in mice infected with *Schistosoma*  
23 *japonicum*. *Parasitology research*. 2008;102(6):1129-34. doi: 10.1007/s00436-008-0880-0.

- 1 PubMed PMID: 18246371.
- 2 14. Davies SJ, Grogan JL, Blank RB, Lim KC, Locksley RM, McKerrow JH. Modulation of blood  
3 fluke development in the liver by hepatic CD4+ lymphocytes. *Science*. 2001;294(5545):1358-  
4 61. doi: 10.1126/science.1064462. PubMed PMID: 11701932.
- 5 15. Amiri P, Locksley RM, Parslow TG, Sadick M, Rector E, Ritter D, et al. Tumour necrosis factor  
6 alpha restores granulomas and induces parasite egg-laying in schistosome-infected SCID  
7 mice. *Nature*. 1992;356(6370):604-7. doi: 10.1038/356604a0. PubMed PMID: 1560843.
- 8 16. Sengupta A, Ghosh S, Sharma S, Sonawat HM. 1H NMR metabonomics indicates continued  
9 metabolic changes and sexual dimorphism post-parasite clearance in self-limiting murine  
10 malaria model. *PloS one*. 2013;8(6):e66954. doi: 10.1371/journal.pone.0066954. PubMed  
11 PMID: 23826178; PubMed Central PMCID: PMC3691208.
- 12 17. Wang Y, Utzinger J, Saric J, Li JV, Burckhardt J, Dirnhofer S, et al. Global metabolic  
13 responses of mice to *Trypanosoma brucei brucei* infection. *Proceedings of the National  
14 Academy of Sciences of the United States of America*. 2008;105(16):6127-32. doi:  
15 10.1073/pnas.0801777105. PubMed PMID: 18413599; PubMed Central PMCID:  
16 PMC2329718.
- 17 18. Zhou CX, Zhou DH, Elsheikha HM, Liu GX, Suo X, Zhu XQ. Global Metabolomic Profiling of  
18 Mice Brains following Experimental Infection with the Cyst-Forming *Toxoplasma gondii*. *PloS  
19 one*. 2015;10(10):e0139635. doi: 10.1371/journal.pone.0139635. PubMed PMID: 26431205;  
20 PubMed Central PMCID: PMC4592003.
- 21 19. Garcia-Perez I, Whitfield P, Bartlett A, Angulo S, Legido-Quigley C, Hanna-Brown M, et al.  
22 Metabolic fingerprinting of *Schistosoma mansoni* infection in mice urine with capillary  
23 electrophoresis. *Electrophoresis*. 2008;29(15):3201-6. doi: 10.1002/elps.200800031. PubMed

- 1 PMID: 18633941.
- 2 20. Thompson SN. Metabolic integration during the host associations of multicellular animal  
3 endoparasites. *Comparative biochemistry and physiology B, Comparative biochemistry*.  
4 1985;81(1):21-42. PubMed PMID: 3893873.
- 5 21. Li JV, Holmes E, Saric J, Keiser J, Dirnhofer S, Utzinger J, et al. Metabolic profiling of a  
6 *Schistosoma mansoni* infection in mouse tissues using magic angle spinning-nuclear  
7 magnetic resonance spectroscopy. *International journal for parasitology*. 2009;39(5):547-58.  
8 doi: 10.1016/j.ijpara.2008.10.010. PubMed PMID: 19068218.
- 9 22. O'Sullivan C, Fried B, Sherma J. Metabolic profiling of *Echinostoma caproni* and *Schistosoma*  
10 *mansoni* in their definitive and intermediate hosts. *Acta parasitologica*. 2013;58(1):1-5. doi:  
11 10.2478/s11686-013-0104-3. PubMed PMID: 23377904.
- 12 23. Bowman IB, Grant PT, Kermack WO. The metabolism of *Plasmodium berghei*, the malaria  
13 parasite of rodents. I. The preparation of the erythrocytic form of *P. berghei* separated from  
14 the host cell. *Experimental parasitology*. 1960;9:131-6. PubMed PMID: 13803493.
- 15 24. Hellerman L, Bovarnick MR, Porter CC. Metabolism of the malarial parasite; action of  
16 antimalarial agents upon separated *Plasmodium lophurae* and upon certain isolated enzyme  
17 systems. *Federation proceedings*. 1946;5:400-5. PubMed PMID: 20999489.
- 18 25. Adebayo AS, Mundhe SD, Awobode HO, Onile OS, Agunloye AM, Isokpehi RD, et al.  
19 Metabolite profiling for biomarkers in *Schistosoma haematobium* infection and associated  
20 bladder pathologies. *PLoS neglected tropical diseases*. 2018;12(4):e0006452. doi:  
21 10.1371/journal.pntd.0006452. PubMed PMID: 29708967.
- 22 26. Teng R, Junankar PR, Bubb WA, Rae C, Mercier P, Kirk K. Metabolite profiling of the  
23 intraerythrocytic malaria parasite *Plasmodium falciparum* by  $(1)H$  NMR spectroscopy. *NMR in*

- 1           biomedicine. 2009;22(3):292-302. doi: 10.1002/nbm.1323. PubMed PMID: 19021153.
- 2    27. Legido-Quigley C. Metabolite-biomarker investigations in the life cycle of and infection with  
3           Schistosoma. Parasitology. 2010;137(9):1425-35. doi: 10.1017/S0031182010000545.  
4           PubMed PMID: 20550753.
- 5    28. Zhou CX, Zhou DH, Elsheikha HM, Zhao Y, Suo X, Zhu XQ. Metabolomic Profiling of Mice  
6           Serum during Toxoplasmosis Progression Using Liquid Chromatography-Mass Spectrometry.  
7           Scientific reports. 2016;6:19557. doi: 10.1038/srep19557. PubMed PMID: 26785939; PubMed  
8           Central PMCID: PMC4726199.
- 9    29. Wang Y, Holmes E, Nicholson JK, Cloarec O, Chollet J, Tanner M, et al. Metabonomic  
10           investigations in mice infected with Schistosoma mansoni: an approach for biomarker  
11           identification. Proceedings of the National Academy of Sciences of the United States of  
12           America. 2004;101(34):12676-81. doi: 10.1073/pnas.0404878101. PubMed PMID: 15314235;  
13           PubMed Central PMCID: PMC515115.
- 14   30. Want EJ, Masson P, Michopoulos F, Wilson ID, Theodoridis G, Plumb RS, et al. Global  
15           metabolic profiling of animal and human tissues via UPLC-MS. Nature protocols.  
16           2013;8(1):17-32. doi: 10.1038/nprot.2012.135. PubMed PMID: 23222455.
- 17   31. Want EJ, Wilson ID, Gika H, Theodoridis G, Plumb RS, Shockcor J, et al. Global metabolic  
18           profiling procedures for urine using UPLC-MS. Nature protocols. 2010;5(6):1005-18. doi:  
19           10.1038/nprot.2010.50. PubMed PMID: 20448546.
- 20   32. Cui L, Zheng D, Lee YH, Chan TK, Kumar Y, Ho WE, et al. Metabolomics Investigation  
21           Reveals Metabolite Mediators Associated with Acute Lung Injury and Repair in a Murine  
22           Model of Influenza Pneumonia. Scientific reports. 2016;6:26076. doi: 10.1038/srep26076.  
23           PubMed PMID: 27188343; PubMed Central PMCID: PMC4870563.

- 1 33. Xia J, Sinelnikov IV, Han B, Wishart DS. MetaboAnalyst 3.0--making metabolomics more  
2 meaningful. *Nucleic acids research*. 2015;43(W1):W251-7. doi: 10.1093/nar/gkv380. PubMed  
3 PMID: 25897128; PubMed Central PMCID: PMC4489235.
- 4 34. Chong J, Soufan O, Li C, Caraus I, Li S, Bourque G, et al. MetaboAnalyst 4.0: towards more  
5 transparent and integrative metabolomics analysis. *Nucleic acids research*.  
6 2018;46(W1):W486-W94. doi: 10.1093/nar/gky310. PubMed PMID: 29762782; PubMed  
7 Central PMCID: PMC6030889.
- 8 35. Xia J, Wishart DS. Using MetaboAnalyst 3.0 for Comprehensive Metabolomics Data Analysis.  
9 *Current protocols in bioinformatics*. 2016;55:14 0 1- 0 91. doi: 10.1002/cpbi.11. PubMed  
10 PMID: 27603023.
- 11 36. Pearce EJ, Huang SC. The metabolic control of schistosome egg production. *Cellular*  
12 *microbiology*. 2015;17(6):796-801. doi: 10.1111/cmi.12444. PubMed PMID: 25850569;  
13 PubMed Central PMCID: PMC4867551.
- 14 37. Koubova J, Menke DB, Zhou Q, Capel B, Griswold MD, Page DC. Retinoic acid regulates sex-  
15 specific timing of meiotic initiation in mice. *Proceedings of the National Academy of Sciences*  
16 *of the United States of America*. 2006;103(8):2474-9. doi: 10.1073/pnas.0510813103.  
17 PubMed PMID: 16461896; PubMed Central PMCID: PMC1413806.
- 18 38. Alsop D, Matsumoto J, Brown S, Van Der Kraak G. Retinoid requirements in the reproduction  
19 of zebrafish. *General and comparative endocrinology*. 2008;156(1):51-62. doi:  
20 10.1016/j.ygcen.2007.11.008. PubMed PMID: 18158153.
- 21 39. Kim YK, Wassef L, Hamberger L, Piantedosi R, Palczewski K, Blaner WS, et al. Retinyl ester  
22 formation by lecithin: retinol acyltransferase is a key regulator of retinoid homeostasis in  
23 mouse embryogenesis. *The Journal of biological chemistry*. 2008;283(9):5611-21. doi:

- 1           10.1074/jbc.M708885200. PubMed PMID: 18093970; PubMed Central PMCID: PMC3771510.
- 2   40. Chung SS, Wolgemuth DJ. Role of retinoid signaling in the regulation of spermatogenesis.
- 3           Cytogenetic and genome research. 2004;105(2-4):189-202. doi: 10.1159/000078189. PubMed
- 4           PMID: 15237207; PubMed Central PMCID: PMC3803148.
- 5   41. Amory JK, Muller CH, Shimshoni JA, Isoherranen N, Paik J, Moreb JS, et al. Suppression of
- 6           spermatogenesis by bisdichloroacetyldiamines is mediated by inhibition of testicular retinoic
- 7           acid biosynthesis. Journal of andrology. 2011;32(1):111-9. doi: 10.2164/jandrol.110.010751.
- 8           PubMed PMID: 20705791; PubMed Central PMCID: PMC3370679.
- 9   42. O'Byrne SM, Blaner WS. Retinol and retinyl esters: biochemistry and physiology. Journal of
- 10           lipid research. 2013;54(7):1731-43. doi: 10.1194/jlr.R037648. PubMed PMID: 23625372;
- 11           PubMed Central PMCID: PMC3679378.
- 12   43. Anderson EL, Baltus AE, Roepers-Gajadien HL, Hassold TJ, de Rooij DG, van Pelt AM, et al.
- 13           Stra8 and its inducer, retinoic acid, regulate meiotic initiation in both spermatogenesis and
- 14           oogenesis in mice. Proceedings of the National Academy of Sciences of the United States of
- 15           America. 2008;105(39):14976-80. doi: 10.1073/pnas.0807297105. PubMed PMID: 18799751;
- 16           PubMed Central PMCID: PMC2542382.
- 17   44. Bowles J, Knight D, Smith C, Wilhelm D, Richman J, Mamiya S, et al. Retinoid Signaling
- 18           Determines Germ Cell Fate in Mice. Science. 2006;312(5773):596-600.
- 19   45. Doyle TJ, Braun KW, McLean DJ, Wright RW, Griswold MD, Kim KH. Potential functions of
- 20           retinoic acid receptor A in Sertoli cells and germ cells during spermatogenesis. Annals of the
- 21           New York Academy of Sciences. 2007;1120:114-30. doi: 10.1196/annals.1411.008. PubMed
- 22           PMID: 17905941.
- 23   46. Duester G. Retinoid signaling in control of progenitor cell differentiation during mouse

- 1 development. *Seminars in cell & developmental biology*. 2013;24(10-12):694-700. doi:  
2 10.1016/j.semcdb.2013.08.001. PubMed PMID: 23973941; PubMed Central PMCID:  
3 PMC3849222.
- 4 47. Kim KH, Griswold MD. The regulation of retinoic acid receptor mRNA levels during  
5 spermatogenesis. *Molecular endocrinology*. 1990;4(11):1679-88. doi: 10.1210/mend-4-11-  
6 1679. PubMed PMID: 2177839.
- 7 48. Liu Z, Sun Y, Jiang Y, Qian Y, Chen S, Gao S, et al. Follicle-stimulating hormone (FSH)  
8 promotes retinol uptake and metabolism in the mouse ovary. *Reproductive biology and*  
9 *endocrinology : RB&E*. 2018;16(1):52. doi: 10.1186/s12958-018-0371-9. PubMed PMID:  
10 29803227; PubMed Central PMCID: PMC5970539.
- 11 49. Nicholls PK, Harrison CA, Rainczuk KE, Wayne Vogl A, Stanton PG. Retinoic acid promotes  
12 Sertoli cell differentiation and antagonises activin-induced proliferation. *Molecular and cellular*  
13 *endocrinology*. 2013;377(1-2):33-43. doi: 10.1016/j.mce.2013.06.034. PubMed PMID:  
14 23831638.
- 15 50. Nourashrafeddin S, Hosseini Rashidi B. Gonadotropin Regulation of Retinoic Acid Activity in  
16 the Testis. *Acta medica Iranica*. 2018;56(1):34-42. PubMed PMID: 29436793.
- 17 51. Paik J, Haenisch M, Muller CH, Goldstein AS, Arnold S, Isoherranen N, et al. Inhibition of  
18 retinoic acid biosynthesis by the bisdichloroacetyldiamine WIN 18,446 markedly suppresses  
19 spermatogenesis and alters retinoid metabolism in mice. *The Journal of biological chemistry*.  
20 2014;289(21):15104-17. doi: 10.1074/jbc.M113.540211. PubMed PMID: 24711451; PubMed  
21 Central PMCID: PMC4031560.
- 22 52. Pradhan A, Olsson PE. Inhibition of retinoic acid synthesis disrupts spermatogenesis and  
23 fecundity in zebrafish. *General and comparative endocrinology*. 2015;217-218:81-91. doi:



- 1        10.1016/j.ygcen.2015.02.002. PubMed PMID: 25687389.
- 2        53. Teletin M, Vernet N, Ghyselinck NB, Mark M. Roles of Retinoic Acid in Germ Cell  
3        Differentiation. *Current topics in developmental biology*. 2017;125:191-225. doi:  
4        10.1016/bs.ctdb.2016.11.013. PubMed PMID: 28527572.
- 5        54. Yu M, Yu P, Leghari IH, Ge C, Mi Y, Zhang C. RALDH2, the enzyme for retinoic acid  
6        synthesis, mediates meiosis initiation in germ cells of the female embryonic chickens. *Amino  
7        acids*. 2013;44(2):405-12. doi: 10.1007/s00726-012-1343-6. PubMed PMID: 22733143.
- 8        55. Ghosh R. Lecithin: Retinol acyltransferase and retinyl esters—is balance the essence in  
9        carcinogenesis? *Cancer Biology & Therapy*. 2014;8(13):1226-7. doi: 10.4161/cbt.8.13.8902.
- 10       56. Tang XH, Su D, Albert M, Scognamiglio T, Gudas LJ. Overexpression of lecithin:retinol  
11       acyltransferase in the epithelial basal layer makes mice more sensitive to oral cavity  
12       carcinogenesis induced by a carcinogen. *Cancer Biol Ther*. 2009;8(13):1212-3. PubMed  
13       PMID: 19471114; PubMed Central PMCID: PMC2882701.
- 14       57. Attia YA, Hussein AS, Tag El-Din AE, Qota EM, Abed El-Ghany AI, El-Sudany AM. Improving  
15       productive and reproductive performance of dual-purpose crossbred hens in the tropics by  
16       lecithin supplementation. *Tropical animal health and production*. 2009;41(4):461-75. doi:  
17       10.1007/s11250-008-9209-3. PubMed PMID: 18661247.
- 18       58. Attia YA, Kamel KI. Semen quality, testosterone, seminal plasma biochemical and antioxidant  
19       profiles of rabbit bucks fed diets supplemented with different concentrations of soybean  
20       lecithin. *Animal : an international journal of animal bioscience*. 2012;6(5):824-33. doi:  
21       10.1017/S1751731111002229. PubMed PMID: 22558930.
- 22       59. Gryseels B, Polman K, Clerinx J, Kestens L. Human schistosomiasis. *Lancet*.  
23       2006;368(9541):1106-18. doi: 10.1016/S0140-6736(06)69440-3. PubMed PMID: 16997665.

- 1 60. Farooqui AA, Horrocks LA, Farooqui T. Glycerophospholipids in brain: their metabolism,  
2 incorporation into membranes, functions, and involvement in neurological disorders.  
3 Chemistry and physics of lipids. 2000;106(1):1-29. PubMed PMID: 10878232.
- 4 61. Zufferey R, Pirani K, Cheung-See-Kit M, Lee S, Williams TA, Chen DG, et al. The  
5 Trypanosoma brucei dihydroxyacetonephosphate acyltransferase TbDAT is dispensable for  
6 normal growth but important for synthesis of ether glycerophospholipids. PloS one.  
7 2017;12(7):e0181432. doi: 10.1371/journal.pone.0181432. PubMed PMID: 28715456;  
8 PubMed Central PMCID: PMC5513551.
- 9 62. Bartke N, Hannun YA. Bioactive sphingolipids: metabolism and function. Journal of lipid  
10 research. 2009;50 Suppl:S91-6. doi: 10.1194/jlr.R800080-JLR200. PubMed PMID: 19017611;  
11 PubMed Central PMCID: PMC2674734.
- 12 63. Hannun YA, Obeid LM. Principles of bioactive lipid signalling: lessons from sphingolipids.  
13 Nature reviews Molecular cell biology. 2008;9(2):139-50. doi: 10.1038/nrm2329. PubMed  
14 PMID: 18216770.
- 15 64. Fukaya T, Gondaira T, Kashiya Y, Kotani S, Ishikura Y, Fujikawa S, et al. Arachidonic acid  
16 preserves hippocampal neuron membrane fluidity in senescent rats. Neurobiology of aging.  
17 2007;28(8):1179-86. doi: 10.1016/j.neurobiolaging.2006.05.023. PubMed PMID: 16790296.
- 18 65. Wang ZJ, Liang CL, Li GM, Yu CY, Yin M. Neuroprotective effects of arachidonic acid against  
19 oxidative stress on rat hippocampal slices. Chemico-biological interactions. 2006;163(3):207-  
20 17. doi: 10.1016/j.cbi.2006.08.005. PubMed PMID: 16982041.
- 21 66. Jing Y, Cui D, Bao F, Hu Z, Qin Z, Hu Y. Tryptophan deficiency affects organ growth by  
22 retarding cell expansion in Arabidopsis. The Plant journal : for cell and molecular biology.  
23 2009;57(3):511-21. doi: 10.1111/j.1365-313X.2008.03706.x. PubMed PMID: 18980661.

- 1 67. Liu HN, Hu CA, Bai MM, Liu G, Tossou MCB, Xu K, et al. Short-term supplementation of  
2 isocaloric meals with L-tryptophan affects pig growth. *Amino acids*. 2017;49(12):2009-14. doi:  
3 10.1007/s00726-017-2440-3. PubMed PMID: 28540509.
- 4 68. Liu Y, Yuan JM, Zhang LS, Zhang YR, Cai SM, Yu JH, et al. Effects of tryptophan  
5 supplementation on growth performance, antioxidative activity, and meat quality of ducks  
6 under high stocking density. *Poultry science*. 2015;94(8):1894-901. doi: 10.3382/ps/pev155.  
7 PubMed PMID: 26089478.
- 8 69. Shen YB, Voilque G, Kim JD, Odle J, Kim SW. Effects of increasing tryptophan intake on  
9 growth and physiological changes in nursery pigs. *Journal of animal science*.  
10 2012;90(7):2264-75. doi: 10.2527/jas.2011-4203. PubMed PMID: 22287672.
- 11 70. Tsuji A, Nakata C, Sano M, Fukuwatari T, Shibata K. L-tryptophan metabolism in pregnant  
12 mice fed a high L-tryptophan diet and the effect on maternal, placental, and fetal growth.  
13 *International journal of tryptophan research : IJTR*. 2013;6:21-33. doi: 10.4137/IJTR.S12715.  
14 PubMed PMID: 24009424; PubMed Central PMCID: PMC3748091.
- 15 71. Zhang E, Dong S, Wang F, Tian X, Gao Q. Effects of l-tryptophan on the growth, intestinal  
16 enzyme activities and non-specific immune response of sea cucumber (*Apostichopus*  
17 *japonicus* Selenka) exposed to crowding stress. *Fish & shellfish immunology*. 2018;75:158-63.  
18 doi: 10.1016/j.fsi.2018.01.009. PubMed PMID: 29331348.
- 19 72. Aruoma OI, Spencer JP, Mahmood N. Protection against oxidative damage and cell death by  
20 the natural antioxidant ergothioneine. *Food and chemical toxicology : an international journal*  
21 *published for the British Industrial Biological Research Association*. 1999;37(11):1043-53.  
22 PubMed PMID: 10566875.
- 23 73. Cheah IK, Halliwell B. Ergothioneine; antioxidant potential, physiological function and role in

- 1 disease. *Biochimica et biophysica acta*. 2012;1822(5):784-93. doi:  
2 10.1016/j.bbadis.2011.09.017. PubMed PMID: 22001064.
- 3 74. Cheah IK, Tang RM, Yew TS, Lim KH, Halliwell B. Administration of Pure Ergothioneine to  
4 Healthy Human Subjects: Uptake, Metabolism, and Effects on Biomarkers of Oxidative  
5 Damage and Inflammation. *Antioxidants & redox signaling*. 2017;26(5):193-206. doi:  
6 10.1089/ars.2016.6778. PubMed PMID: 27488221.
- 7 75. Zhu BZ, Mao L, Fan RM, Zhu JG, Zhang YN, Wang J, et al. Ergothioneine prevents copper-  
8 induced oxidative damage to DNA and protein by forming a redox-inactive ergothioneine-  
9 copper complex. *Chemical research in toxicology*. 2011;24(1):30-4. doi: 10.1021/tx100214t.  
10 PubMed PMID: 21047085.

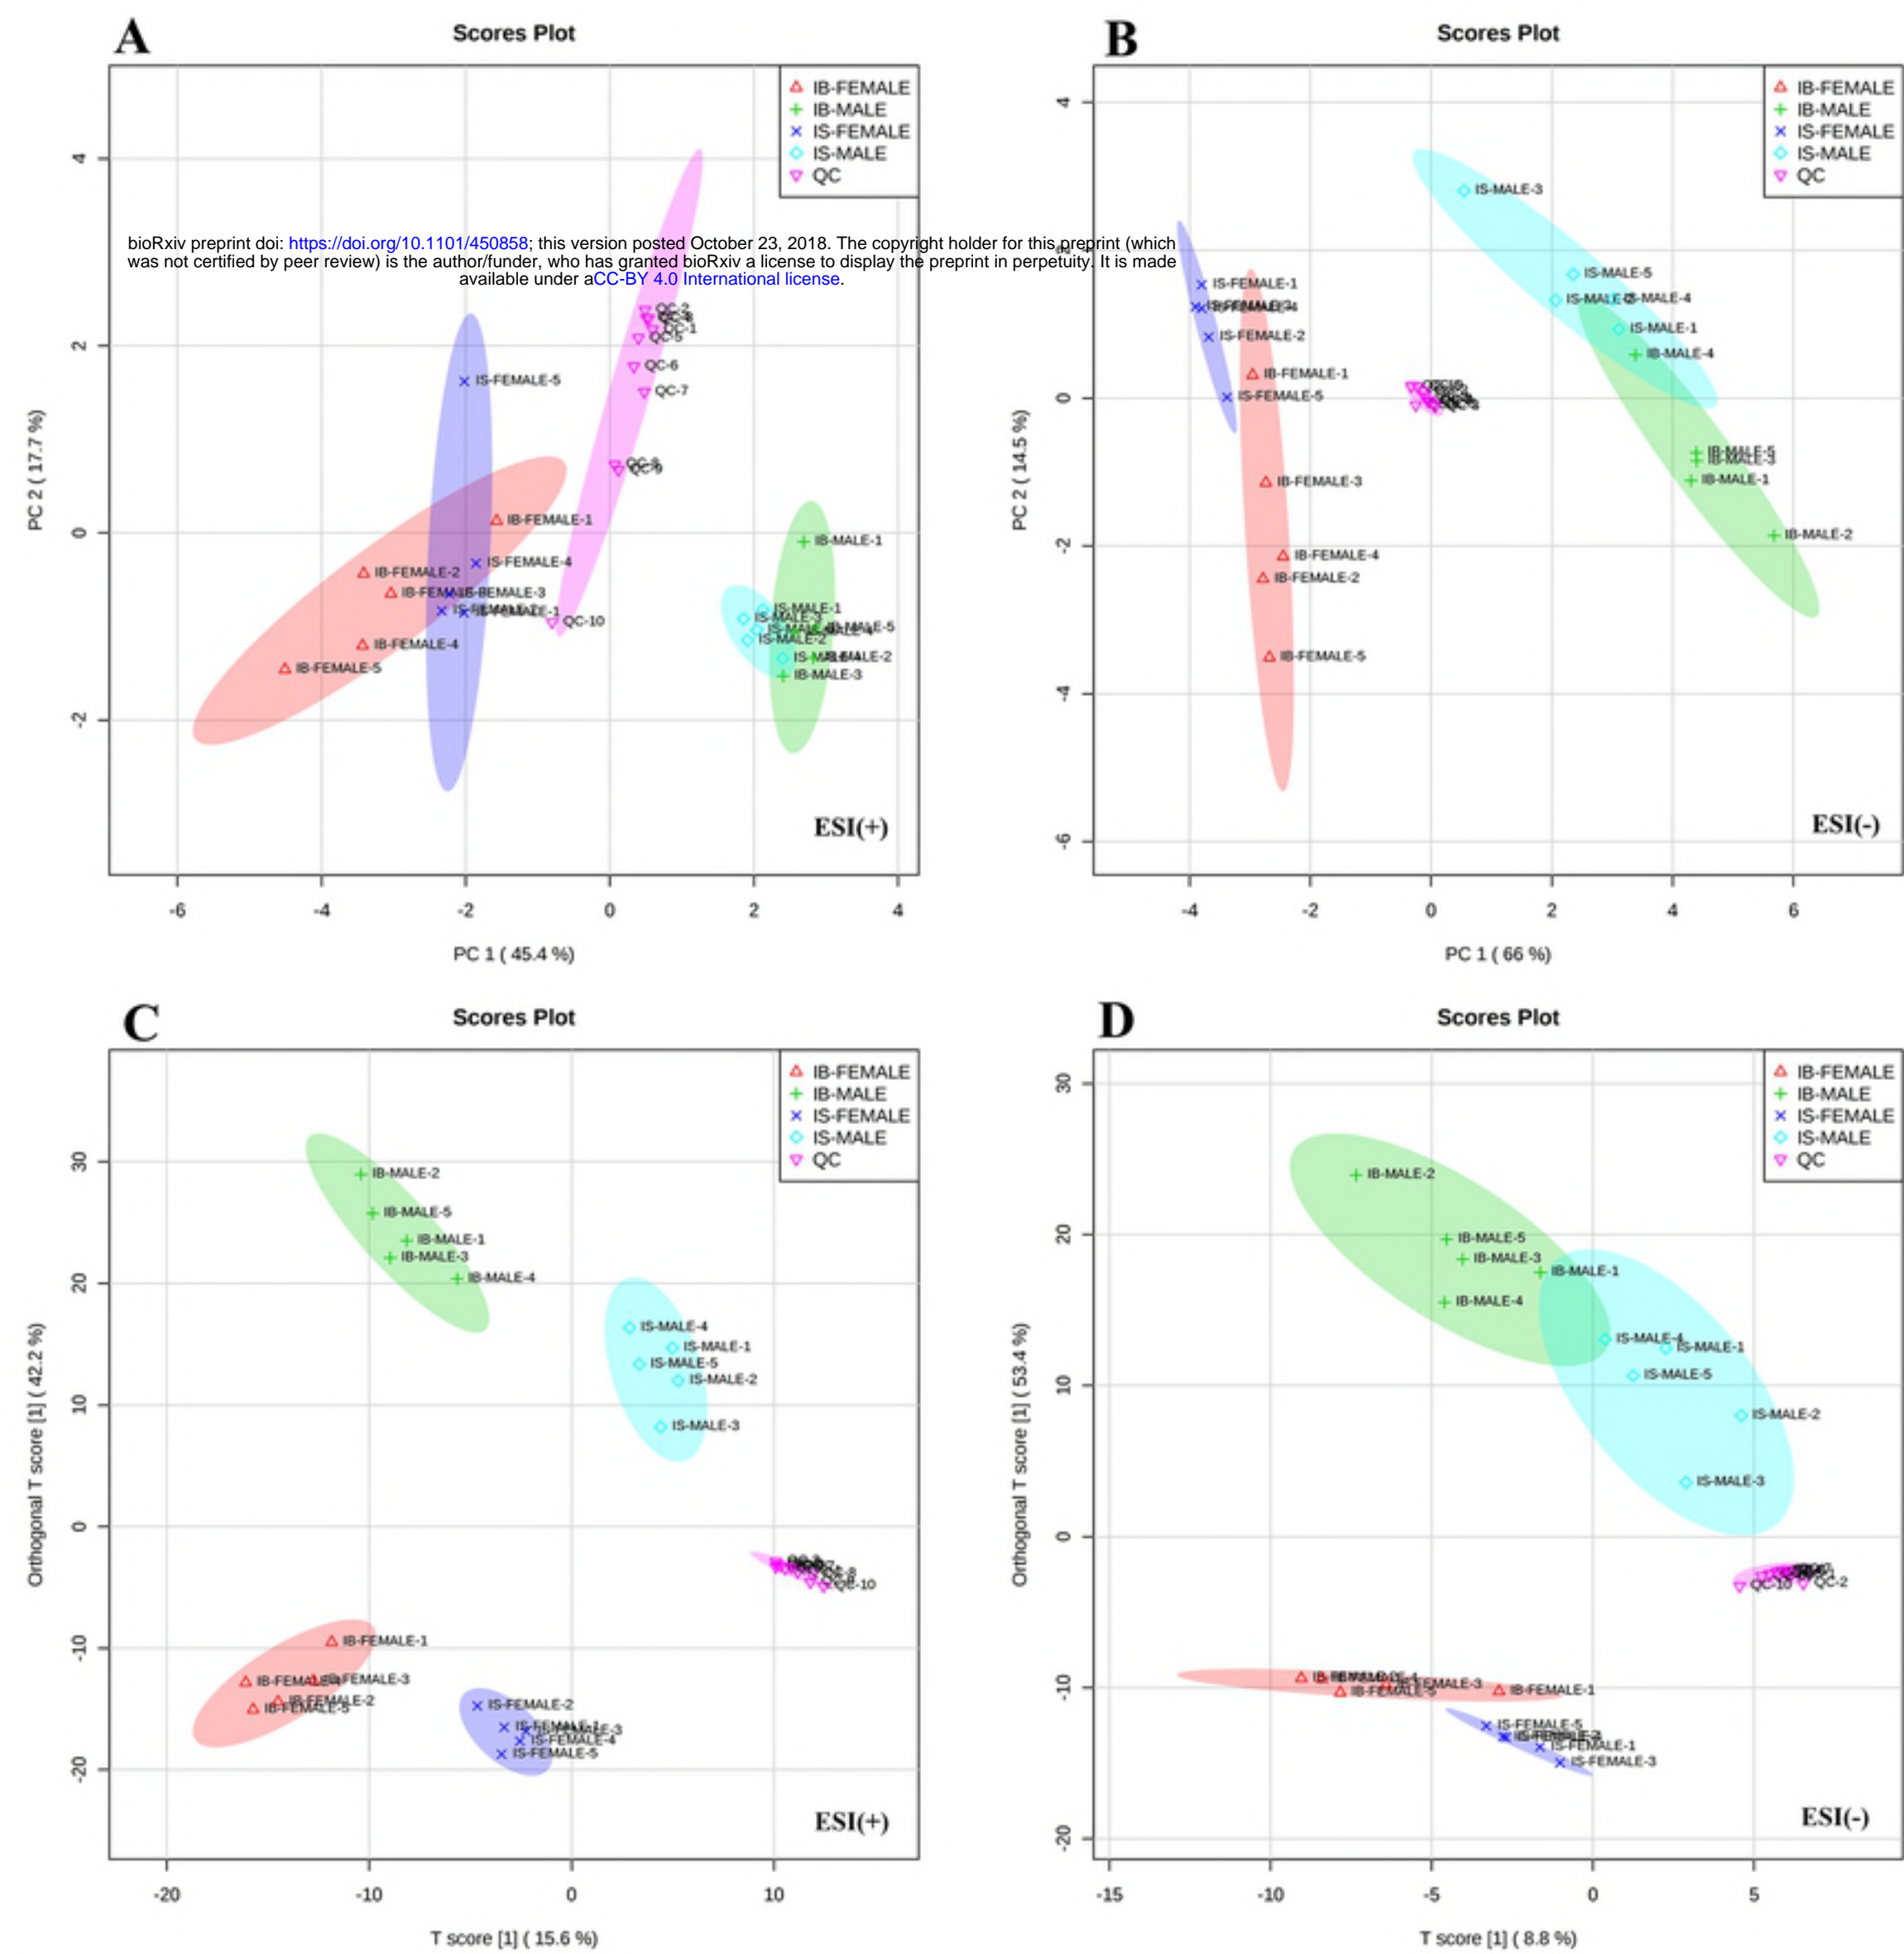

Figure 1

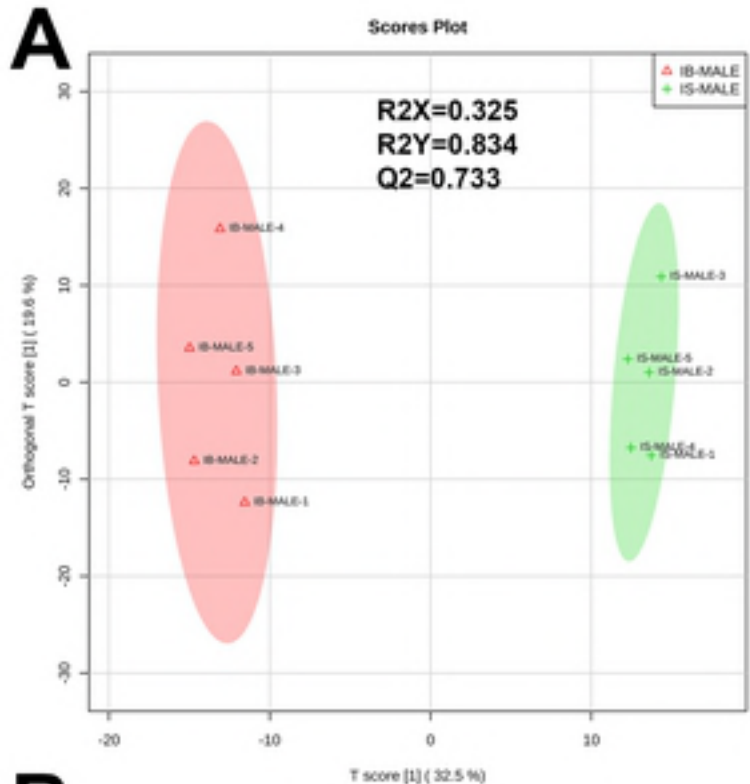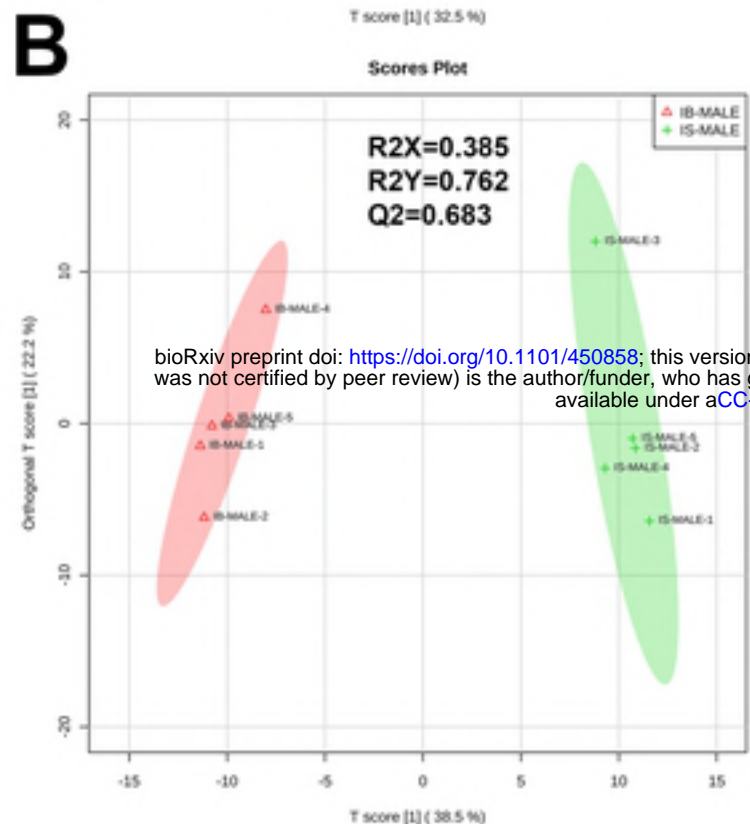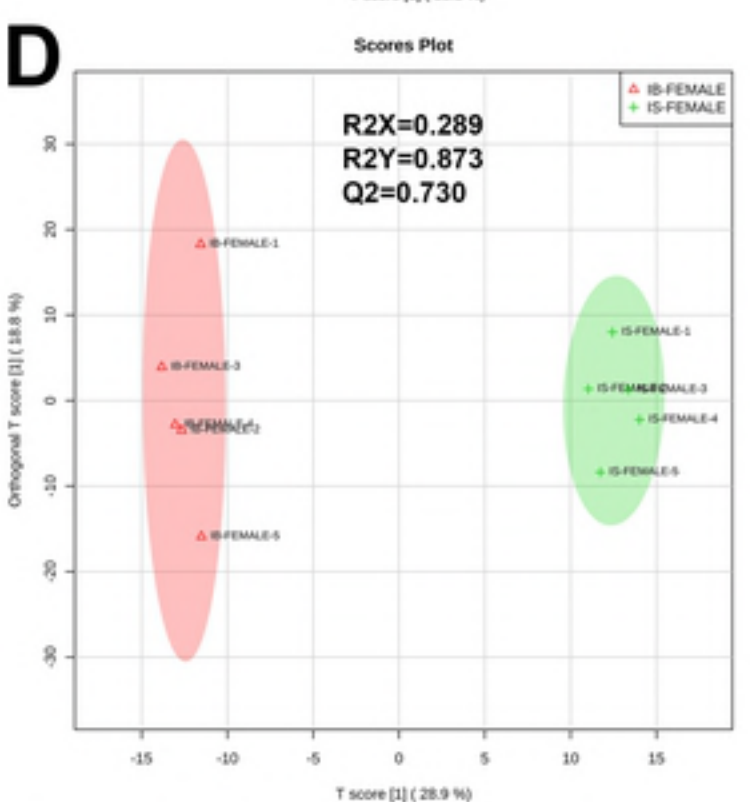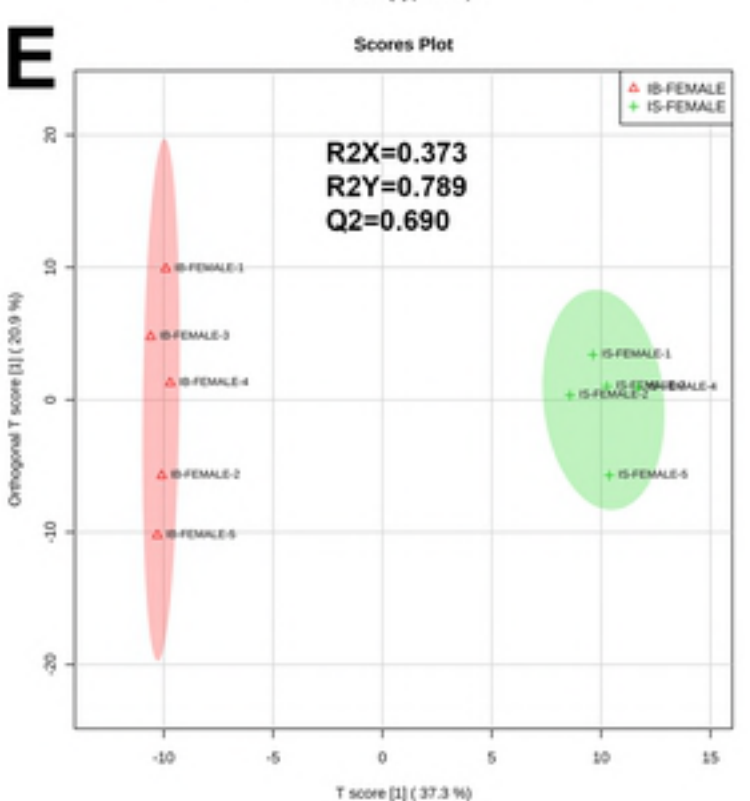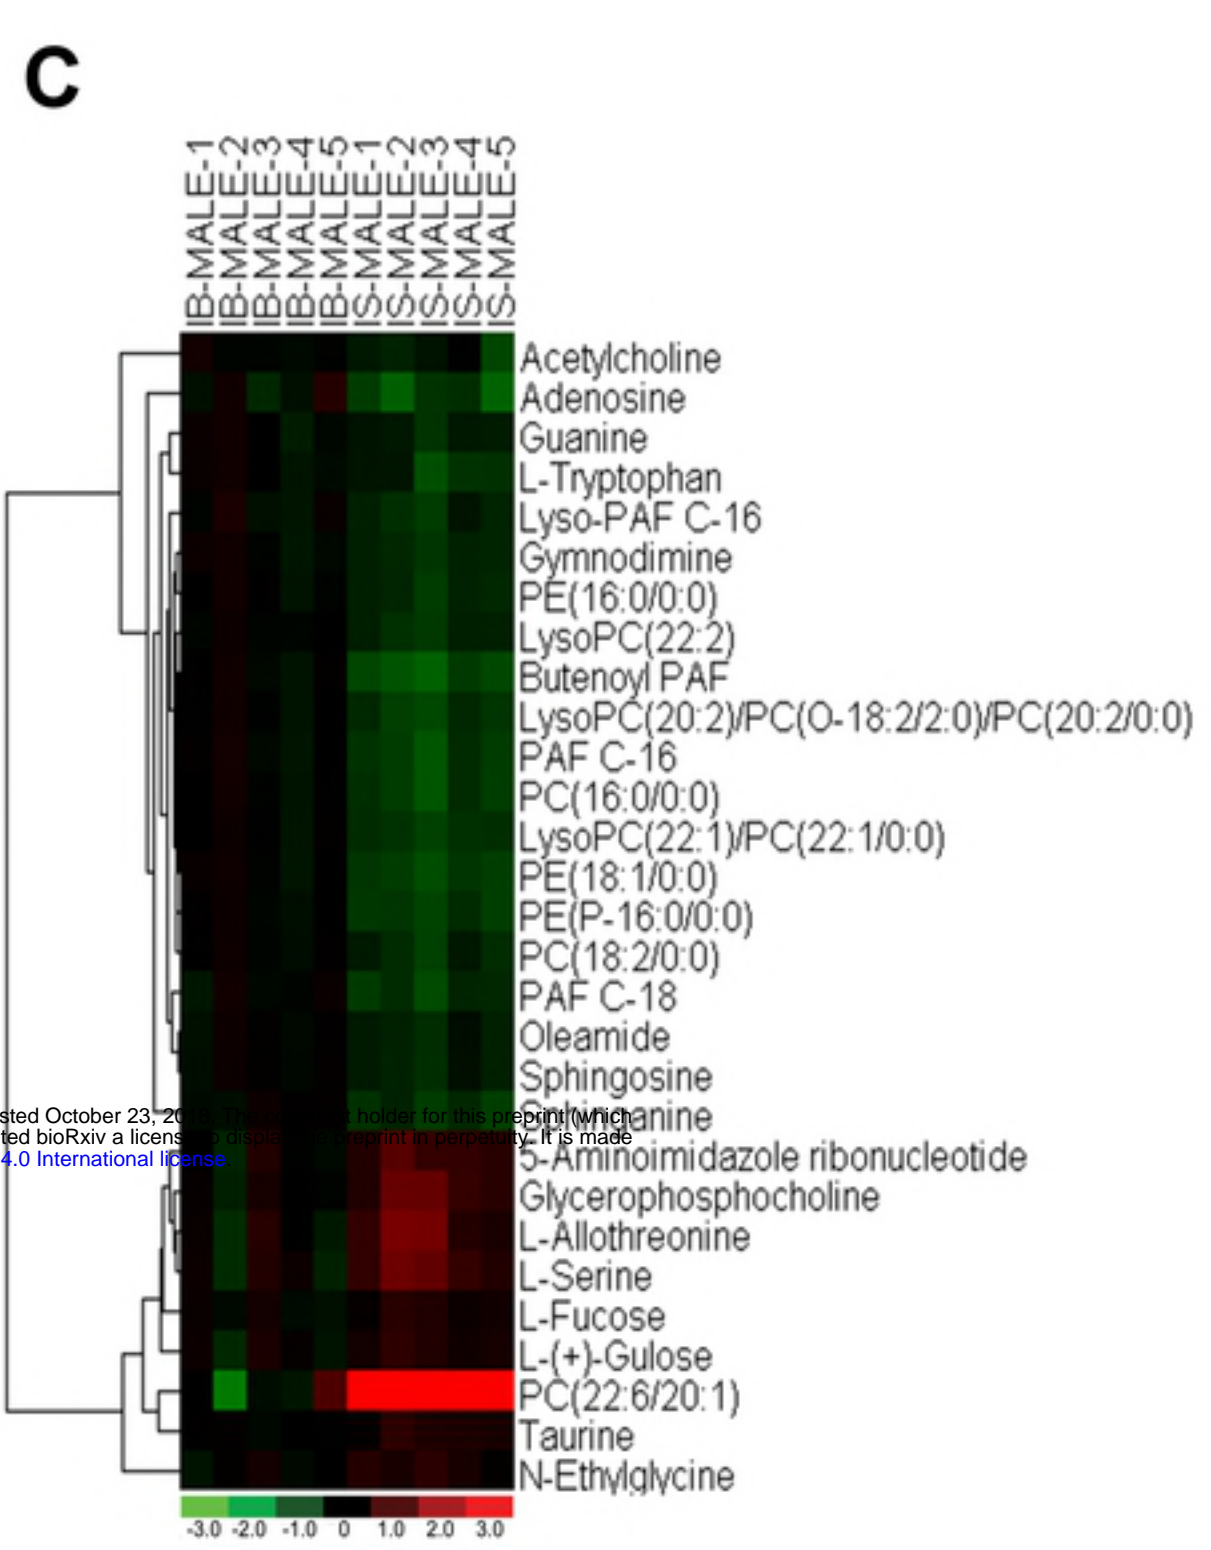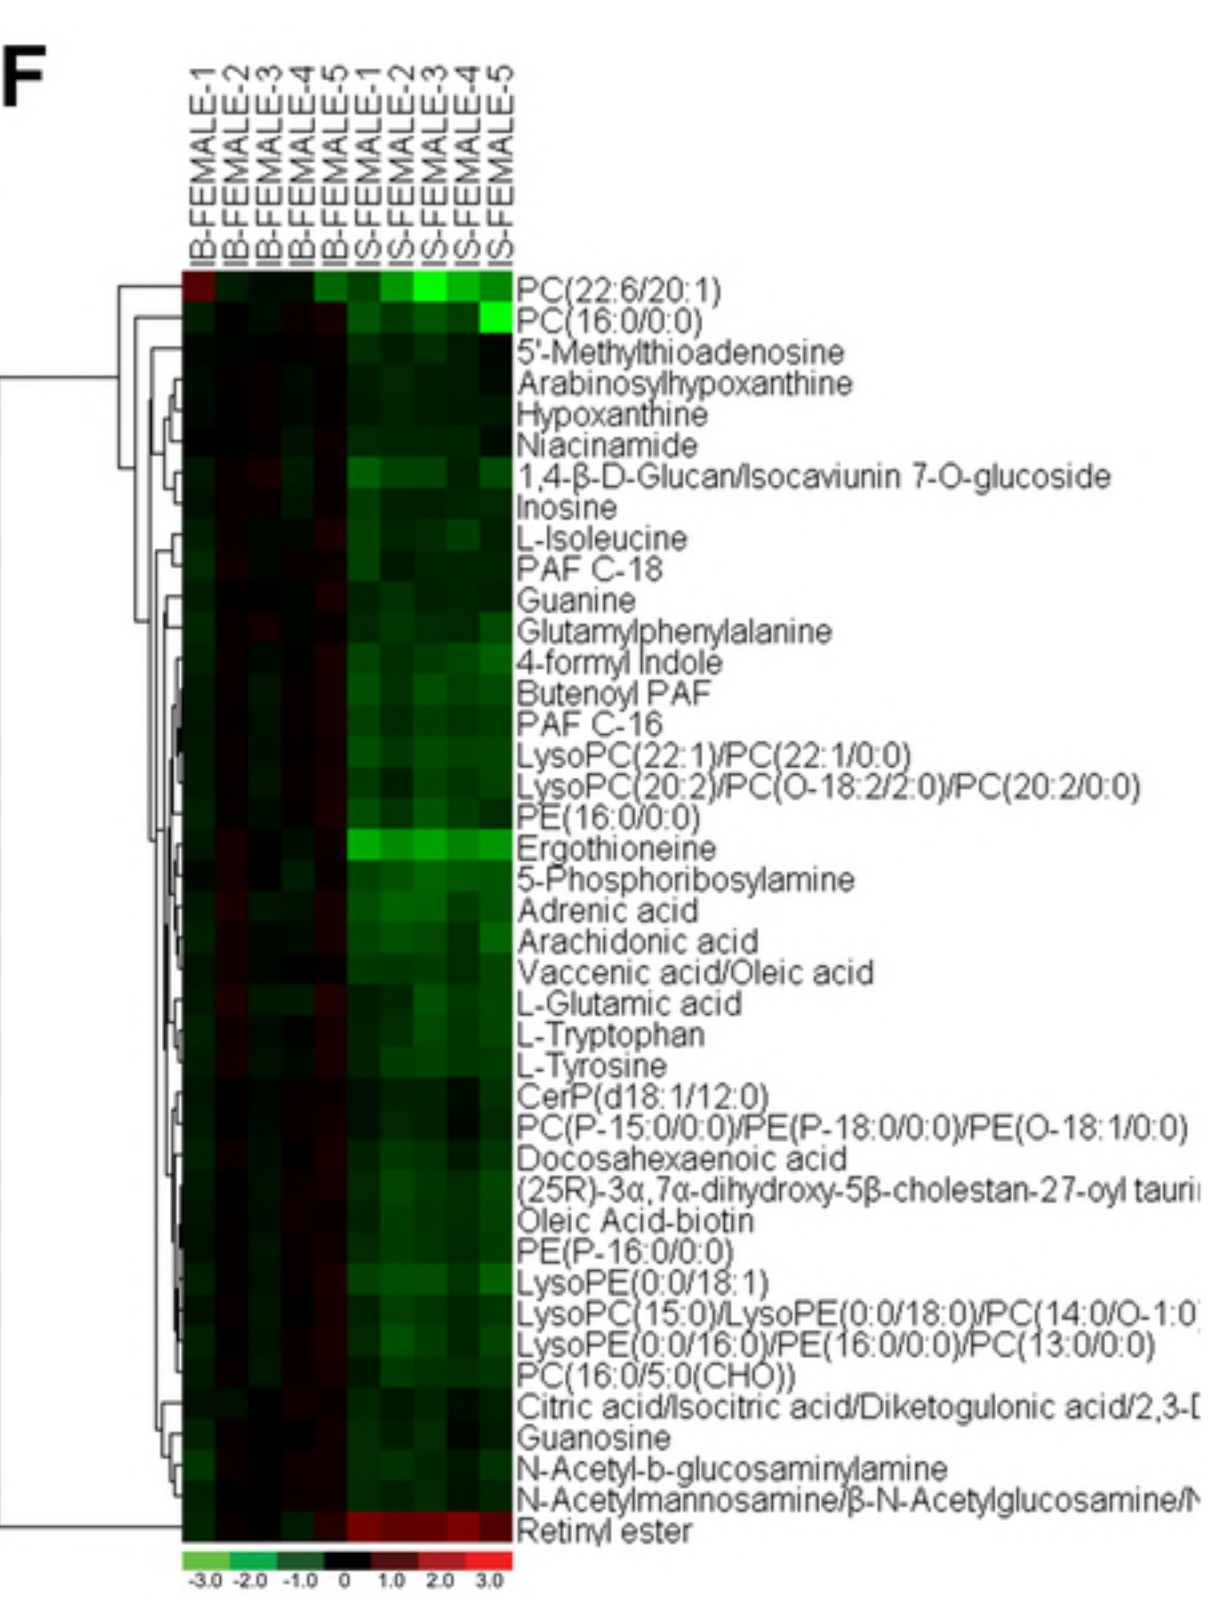

Figure 2

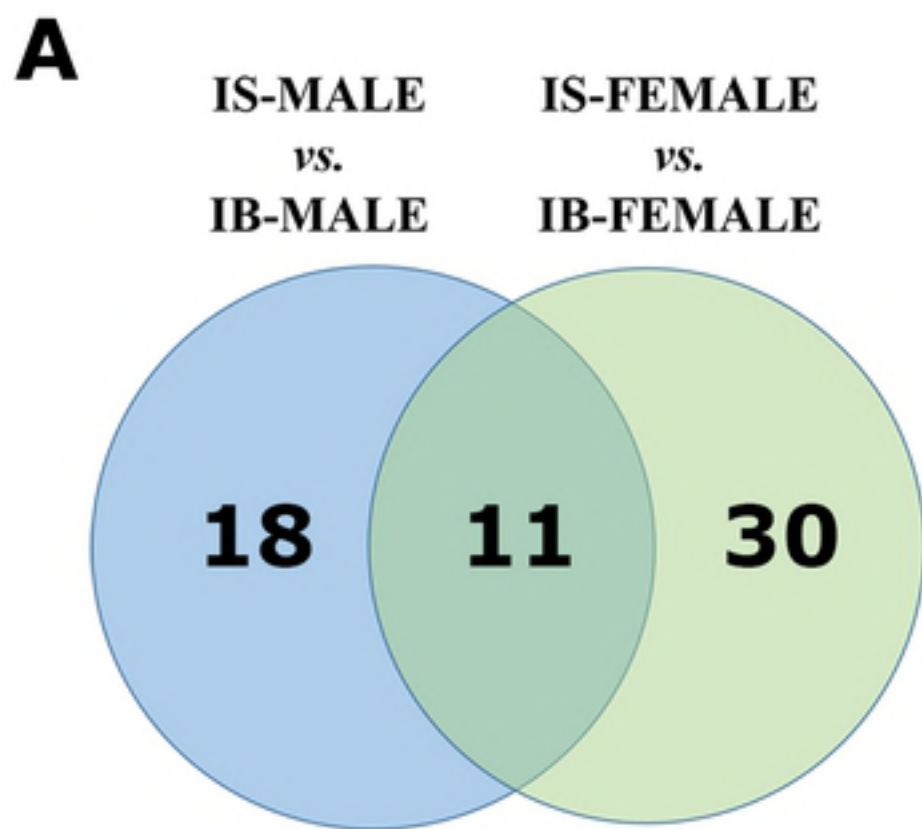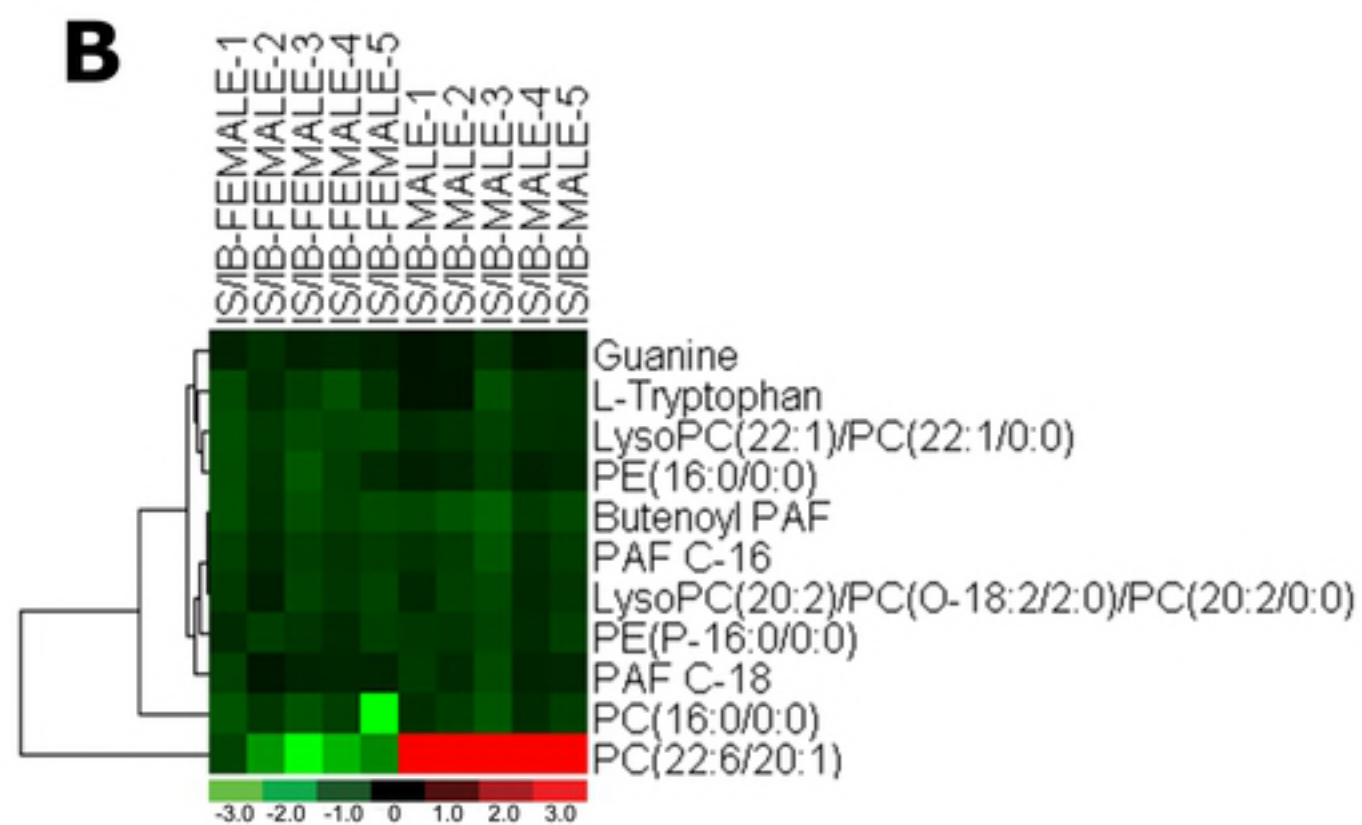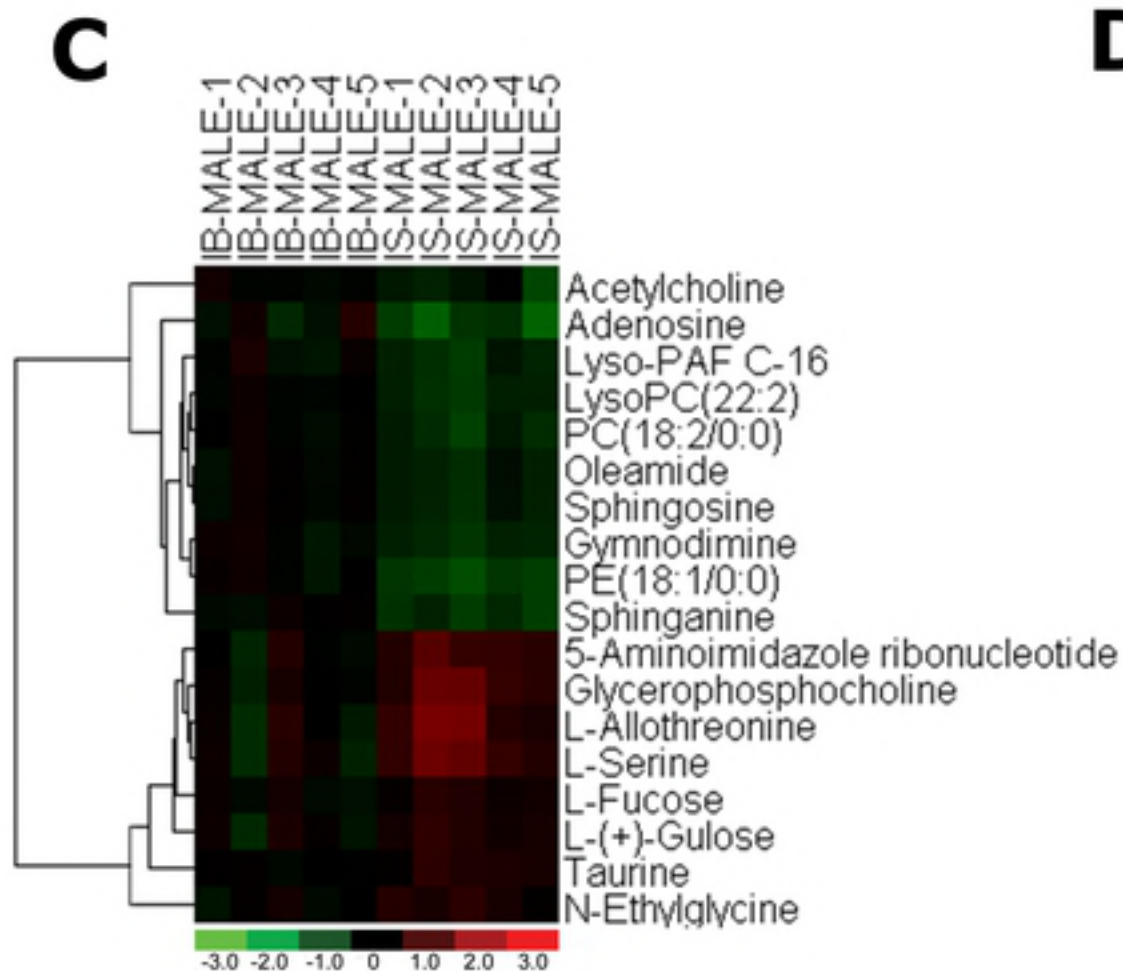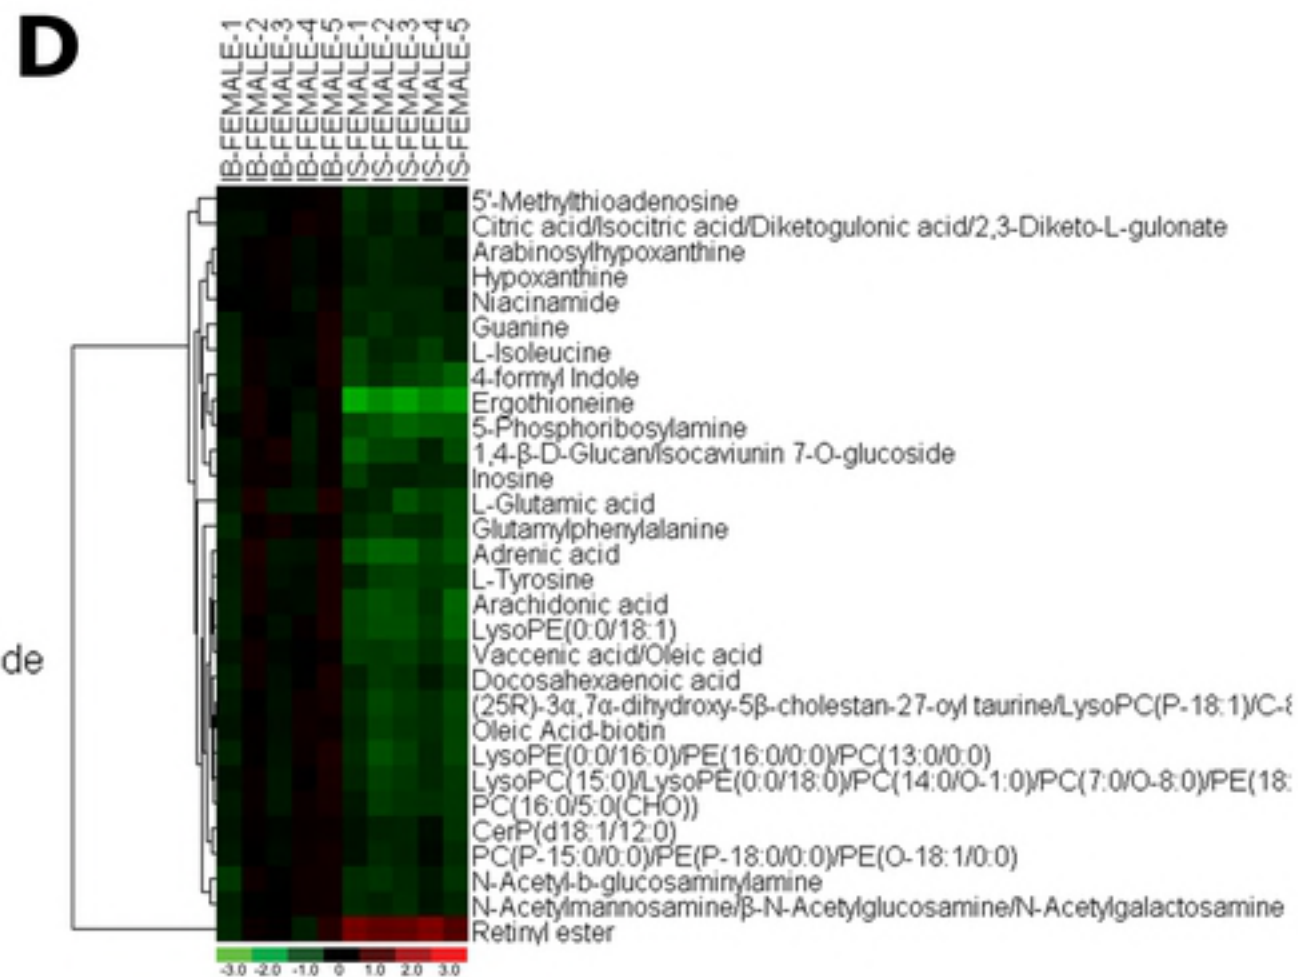

Figure 3

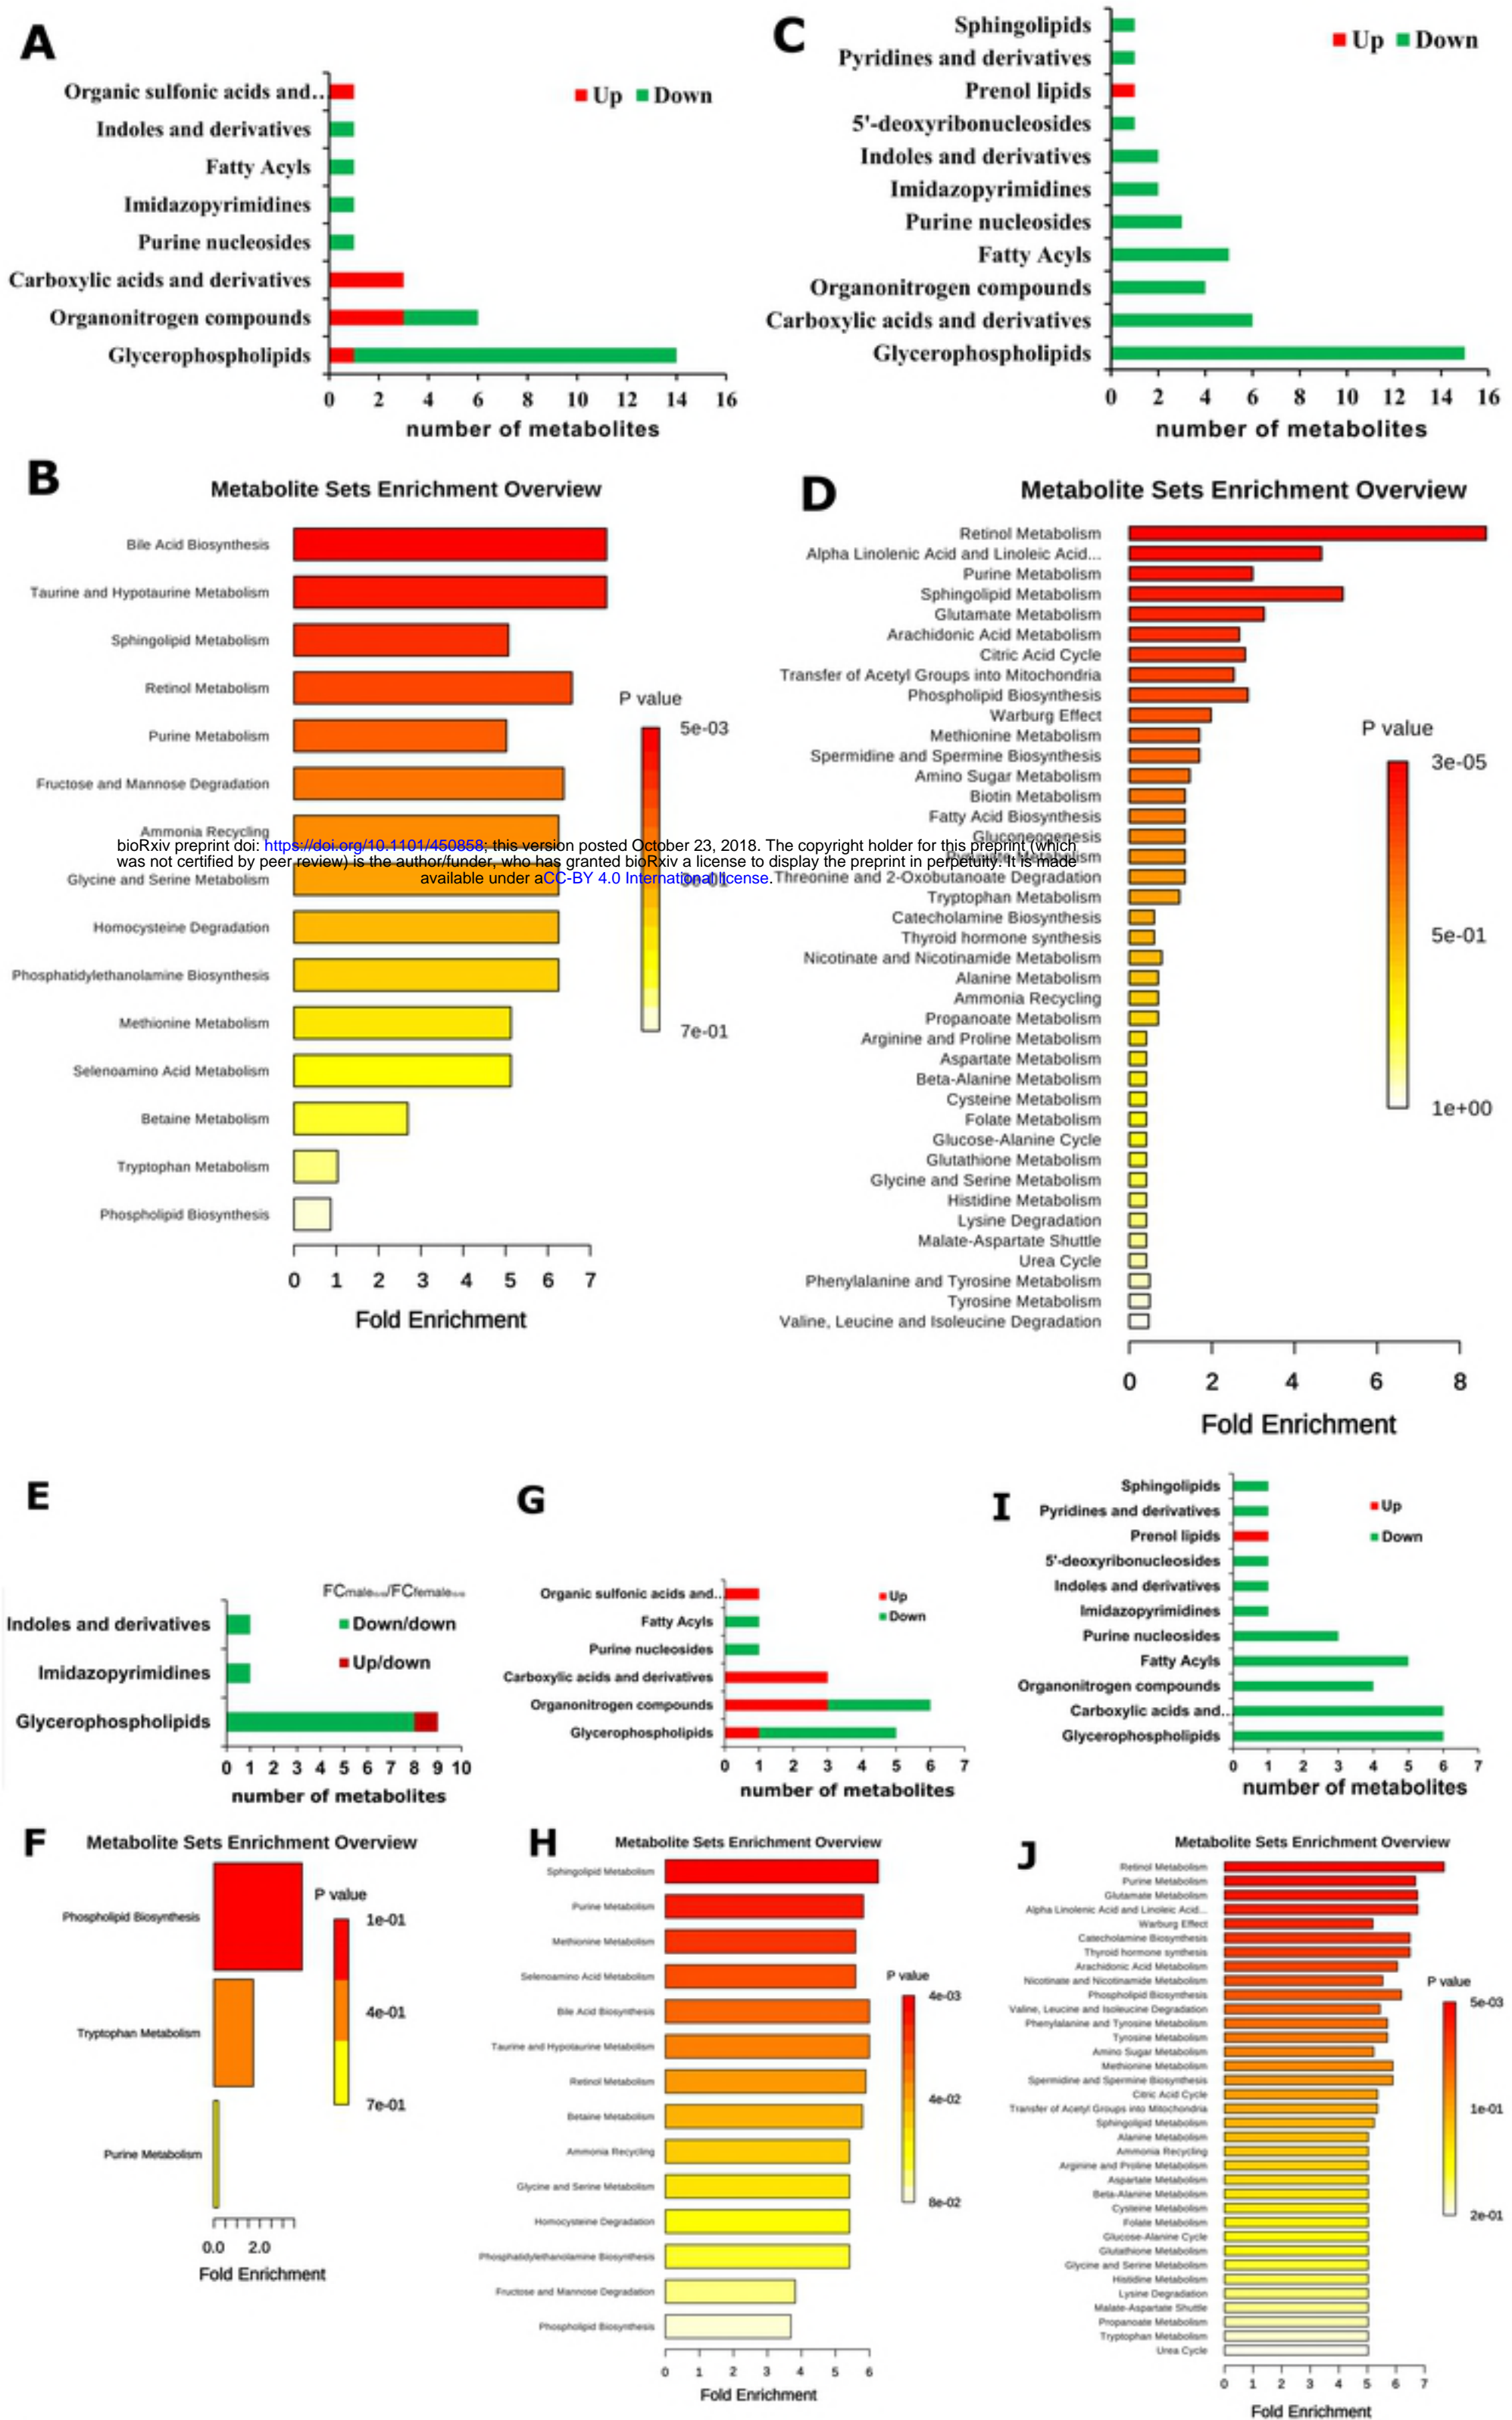

Figure 4



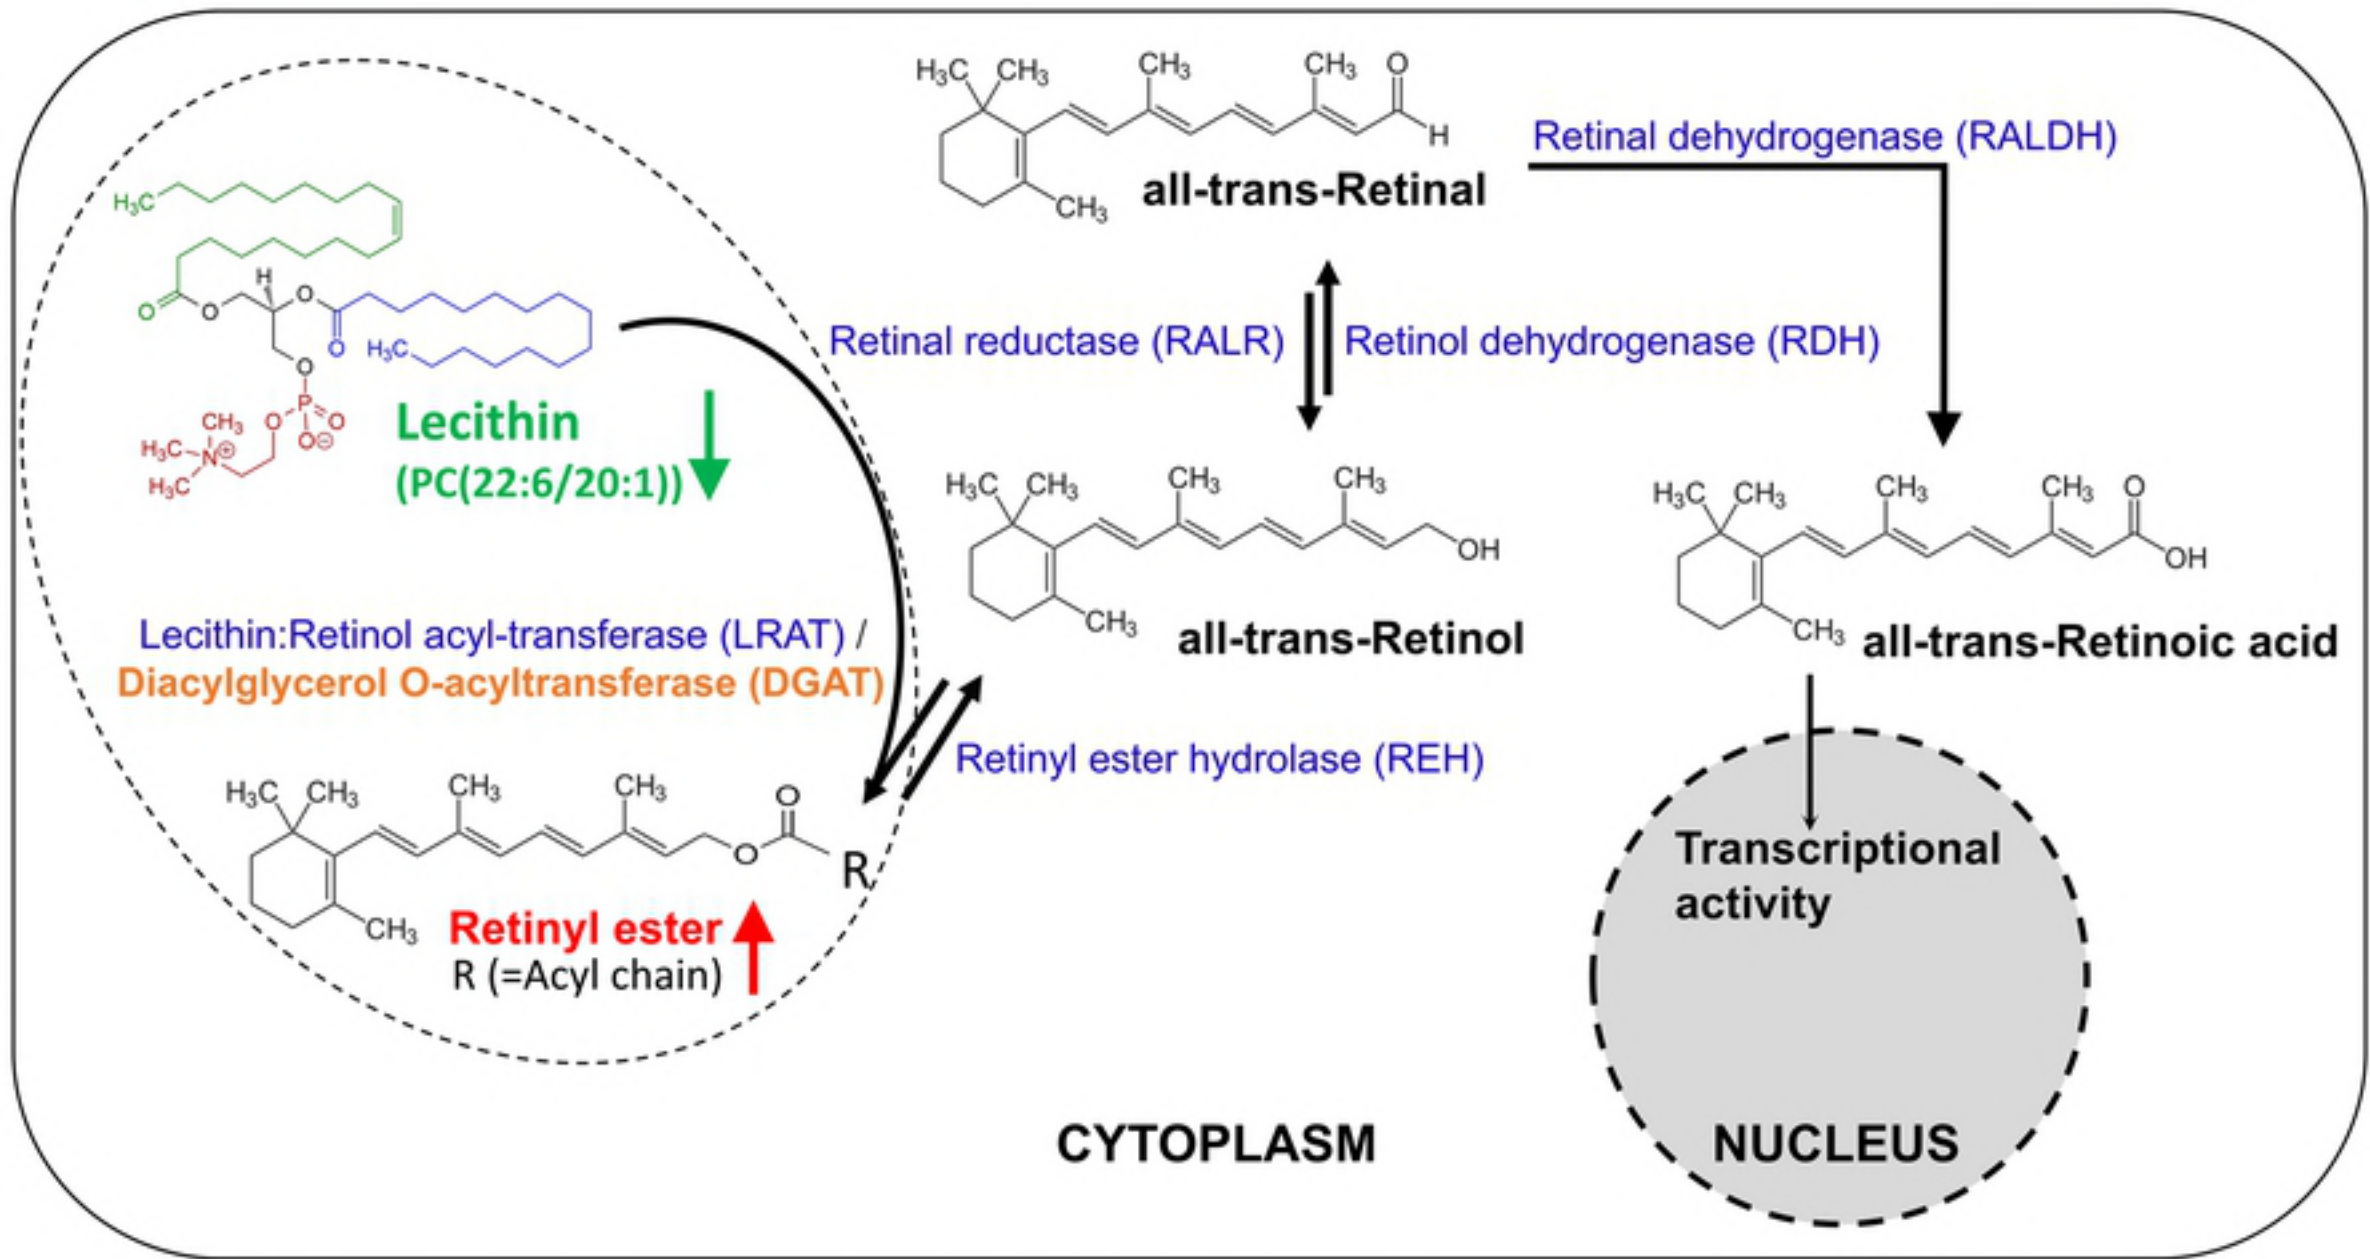

Figure 5

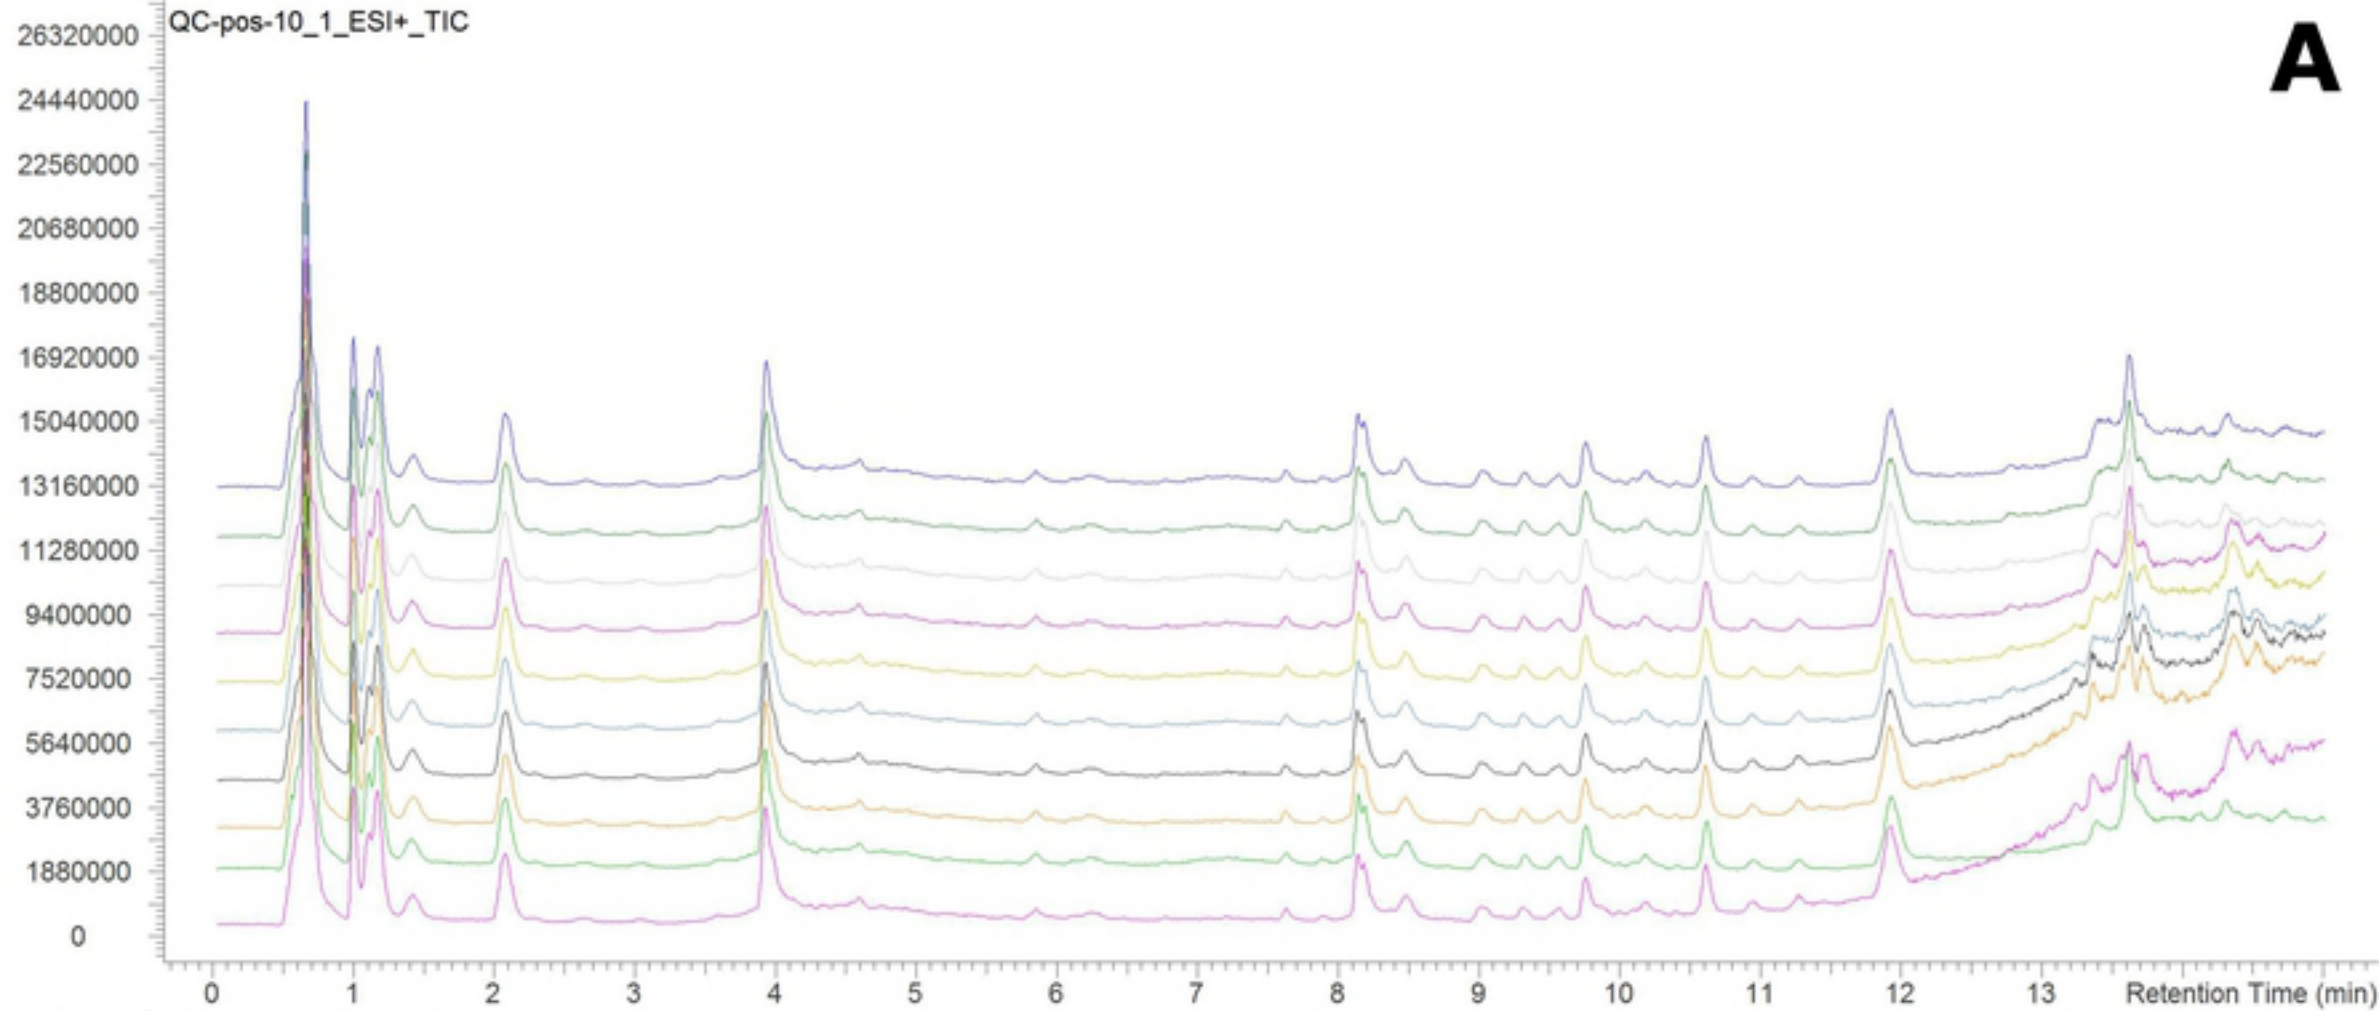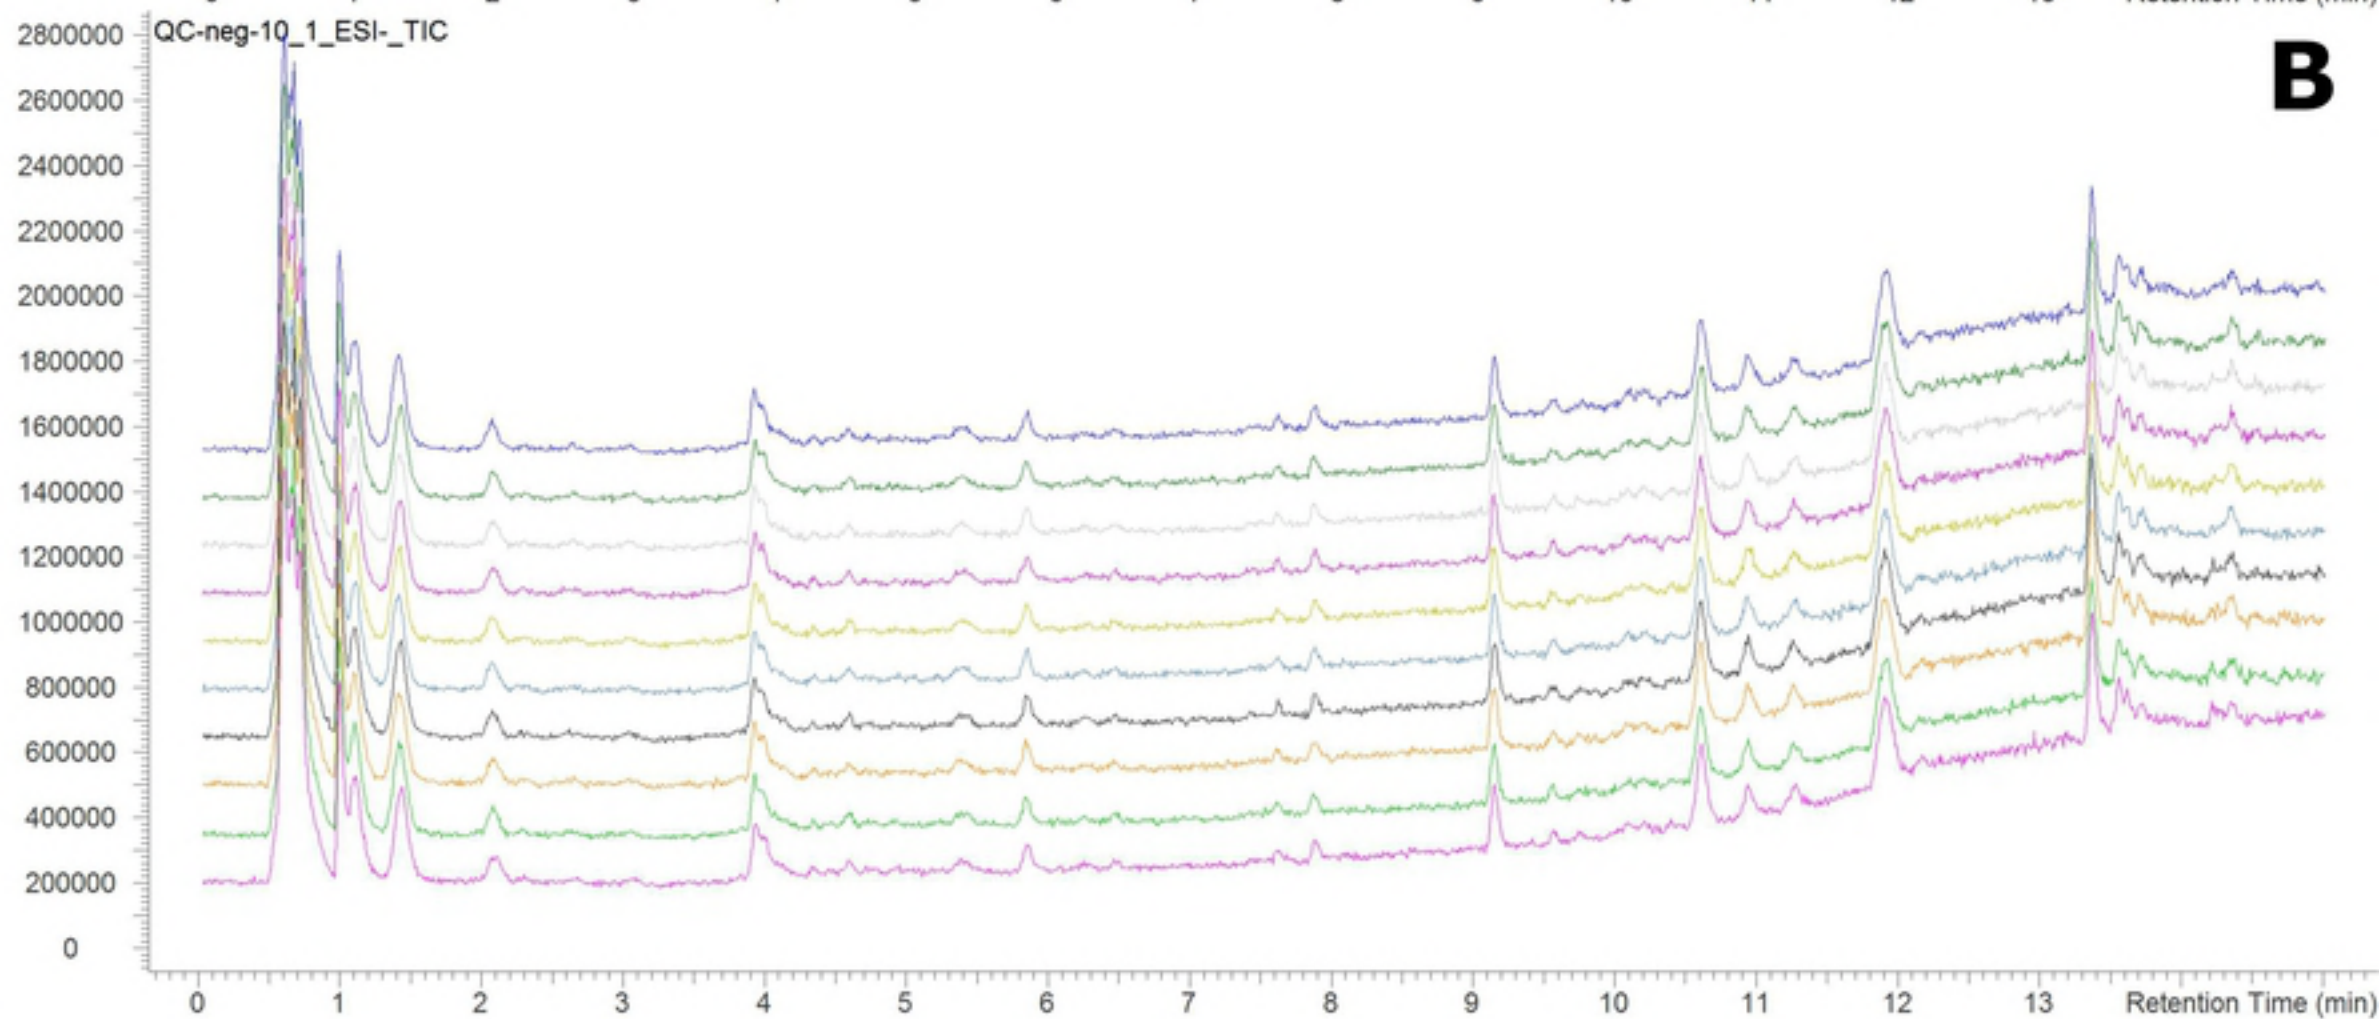

Figure S1

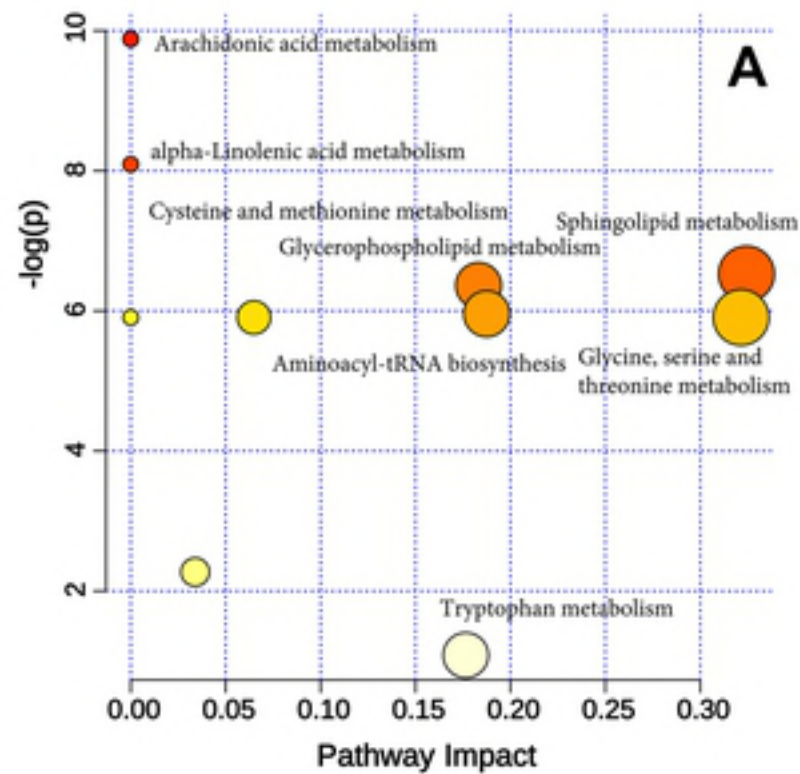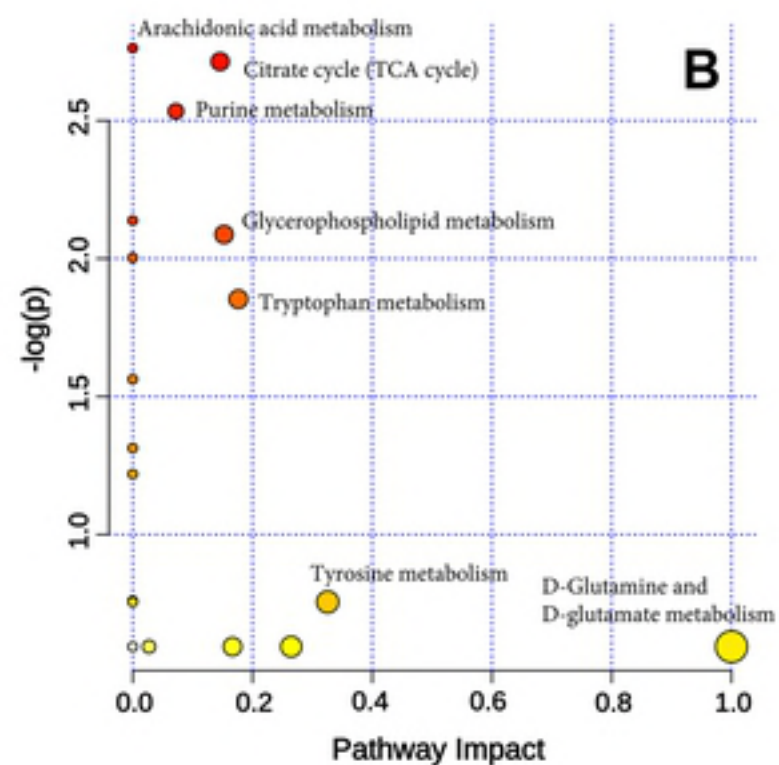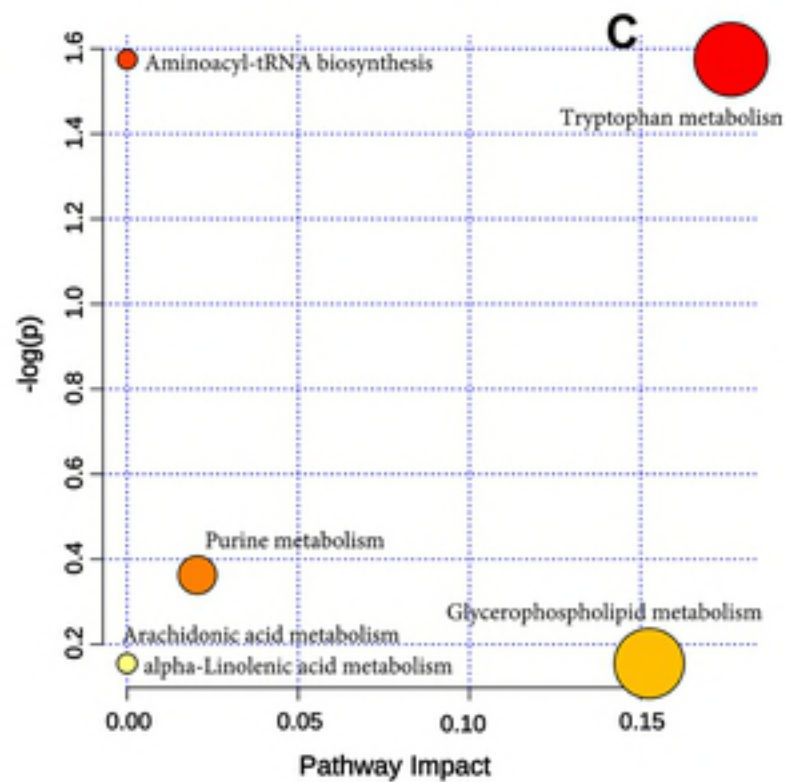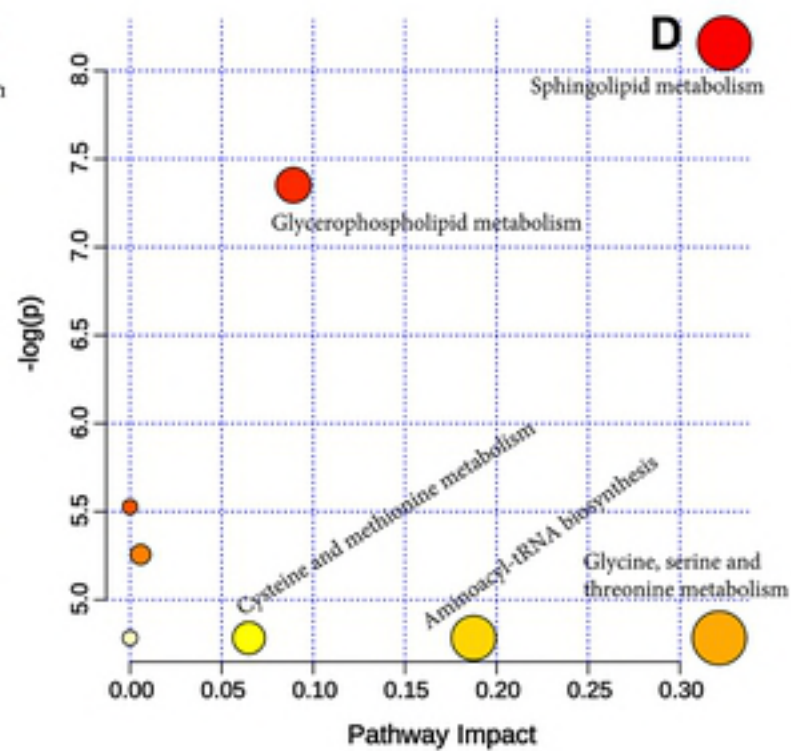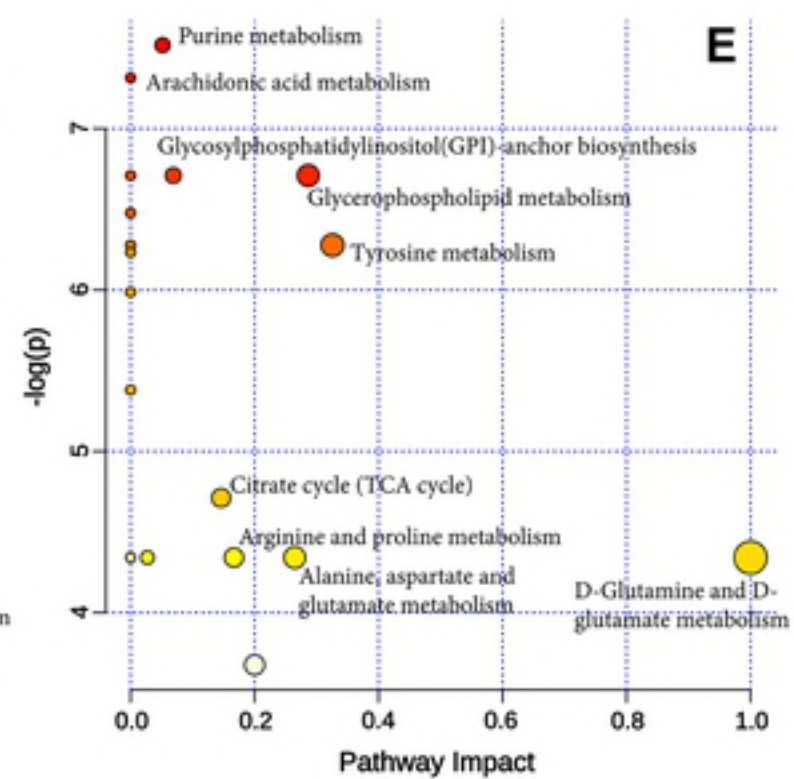

Figure S2
